# Supplementary material for: Inhibition of noradrenergic signalling in rodent orbitofrontal cortex impairs the updating of goal-directed actions
Source: eLife. 2023 Feb 20;12:e81623. doi: 10.7554/eLife.81623 (PMC9988255; doi:10.7554/eLife.81623)
Supplement: Figure 1—figure supplement 2—source data 1. — This excel file contains the raw data from the quantification of DβH-positive fibres in MO, M2, and insular cortex. [file elife-81623-fig1-figsupp2-data1.xlsx]

## Sheet: Figure 1 - figure supplement 1
Group	MO	M2	Insula		=======================================					================================================						===================================
Control	3.14216	5.39294	2.37608		PSY					PSY						PSY
Control	4.08235	4.70601	4.66863		=======================================					================================================						===================================
Control	2.19922	3.71556	3.7749		Title: Control vs saporin: medial OFC					Title: Control vs saporin: Motor region 2 (M2)						Title: Control vs saporin: Insula
Control	3.00118	6.62641	4.61882		Date: 22/09/2022 Time: 14:32:16					Date: 23/09/2022 Time: 12:35:53						Date: 23/09/2022 Time: 12:37:13
Control	3.21869	3.72706	3.01451		---------------------------------------					------------------------------------------------						-----------------------------------
Control	4.21961	5.12497	3.4498
Control	2.80078	6.67621	7.60431		Number of Groups: 2					Number of Groups: 2						Number of Groups: 2
Control	1.74706	5.49046	5.70431		Number of Measurements: 1					Number of Measurements: 1						Number of Measurements: 1
Control	2.82549	5.70562	4.03059
Control	3.3551	3.79627	6.00667		Number of subjects in...					Number of subjects in...						Number of subjects in...
Control	3.16471	4.86536	2.62902		Group 1: 26					Group 1: 26						Group 1: 23
Control	2.46353	4.92275	1.17216		Group 2: 25					Group 2: 29						Group 2: 25
Control	3.13294	4.21242	3.96039
Control	3.29922	3.45595	1.8149		Between contrast coefficients					Between contrast coefficients						Between contrast coefficients
Control	3.20882	2.68954	4.94353		Contrast Group...					Contrast Group...						Contrast Group...
Control	3.71451	5.34235	4.14275		1 2					1 2						1 2
Control	4.37608	2.91804	2.94824		B1 1 -1					B1 1 -1						B1 1 -1
Control	4.58706	4.89203	1.30588
Control	3.6211	3.01503	1.81529		Means and Standard Deviations					Means and Standard Deviations						Means and Standard Deviations
Control	3.1485	1.98209	3.81373		Group 1 Overall Mean: 3.227					Group 1 Overall Mean: 4.153						Group 1 Overall Mean: 3.615
Control	4.15678	4.11863	3.33059		Measurement 1					Measurement 1						Measurement 1
Control	4.51582	2.94405	5.00353		Mean 3.227					Mean 4.153						Mean 3.615
Control	2.71951	2.8149	1.00588		SD 0.963					SD 1.278						SD 1.658
Control	3.8749	2.75242
Control	3.30725	3.01804			Group 2 Overall Mean: 0.601					Group 2 Overall Mean: 0.898						Group 2 Overall Mean: 0.929
Control	0	3.07647			Measurement 1					Measurement 1						Measurement 1
Saporin	0.459608	0.602222	1.17725		Mean 0.601					Mean 0.898						Mean 0.929
Saporin	0.530588	1.13908	1.33686		SD 0.278					SD 0.328						SD 0.300
Saporin	1.14461	0.919608	1.20471
Saporin	0.0705882	1.1502	0.652157		Means and SDs averaged across groups					Means and SDs averaged across groups						Means and SDs averaged across groups
Saporin	0.606471	0.648039	0.754118		Measurement 1					Measurement 1						Measurement 1
Saporin	0.309647	0.679739	1.02078		Mean 1.914					Mean 2.526						Mean 2.272
Saporin	1.01373	1.47438	1.14392		SD 0.715					SD 0.910						SD 1.167
Saporin	0.326078	0.758824	0.944314		--------------------					--------------------						--------------------
Saporin	1.36894	0.849804	1.01569
Saporin	0.670588	1.66902	1.1251		Analysis of Variance Summary Table					Analysis of Variance Summary Table						Analysis of Variance Summary Table
Saporin	0.521333	0.797386	1.1451
Saporin	0.551111	1.5732	0.829412		Source SS df MS F					Source SS df MS F						Source SS df MS F
Saporin	0.548078	0.706471	0.427843		------------------------------------------------					------------------------------------------------						------------------------------------------------
Saporin	0.662902	0.856471	0.752157		Between					Between						Between
Saporin	0.674314	0.679346	0.542353		------------------------------------------------					------------------------------------------------						------------------------------------------------
Saporin	0.507608	0.491569	0.721176		B1 87.871 1 87.871 171.917					B1 145.237 1 145.237 175.487						B1 86.425 1 86.425 63.495
Saporin	0.615529	0.763137	0.783137		Error 25.045 49 0.511					Error 43.864 53 0.828						Error 62.612 46 1.361
Saporin	0.566196	0.864837	1.26235		------------------------------------------------					------------------------------------------------						------------------------------------------------
Saporin	0.253039	0.843529	1.03098
Saporin	0.723608	0.693464	0.605882
Saporin	0.409804	0.777843	0.435294
Saporin	0.908706	0.682353	1.31373
Saporin	0.416784	0.44	0.473725
Saporin	0.534216	1.03882	1.09569
Saporin	0.627216	0.837516	1.42
Saporin		0.403333
Saporin		1.3451
Saporin		1.01582
Saporin		1.34863
