# Supplementary material for: Inhibition of noradrenergic signalling in rodent orbitofrontal cortex impairs the updating of goal-directed actions
Source: eLife. 2023 Feb 20;12:e81623. doi: 10.7554/eLife.81623 (PMC9988255; doi:10.7554/eLife.81623)
Supplement: Figure 1—figure supplement 3—source data 1. — This excel file contains the raw data from the consumption tests conducted after the initial outcome devaluation test and the reversal outcome devaluation test. [file elife-81623-fig1-figsupp3-data1.xlsx]

## Sheet: Figure 1-supplement figure 2
			Initial test		Reversal test			=========================================						==========================================
Group		Group label	Consumption (dev)	Consumption (Ndev)	Consumption (dev)	Consumption (Ndev)		PSY						PSY
Pre	CTRL	1	0.6	2.9	0	0.6		=========================================						==========================================
Pre	CTRL	1	0	3.3	0	1.1		Title: Expt 1: Initial consumption test						Title: Expt 1: Reversal consumption test
Pre	CTRL	1	0	6.8	0.2	4.9		Date: 3/10/2022 Time: 12:24:53 PM						Date: 3/10/2022 Time: 4:11:41 PM
Pre	CTRL	1	0	1.4	0	0.6		-----------------------------------------						------------------------------------------
Pre	CTRL	1	0	2.3	0	3.2
Pre	CTRL	1	0	2	0	1.7		Number of Groups: 4						Number of Groups: 4
Pre	CTRL	1	0	1.3	0	5.2		Number of Measurements: 2						Number of Measurements: 2
Pre	CTRL	1	0	0.3	0	0.8
Pre	CTRL	1	0	2.1	0	0.9		Number of subjects in...						Number of subjects in...
Pre	CTRL	1	0.1	3.9	0	4.4		Group 1: 14						Group 1: 14
Pre	CTRL	1	0.1	2.3	0	1.2		Group 2: 15						Group 2: 15
Pre	CTRL	1	0	1.2	0	6.9		Group 3: 13						Group 3: 13
Pre	CTRL	1	0	1.9	0	0.5		Group 4: 15						Group 4: 15
Pre	CTRL	1	0	3.3	0	4.3
Pre	SAP	2	0	2.2	0	0.4		Between contrast coefficients						Between contrast coefficients
Pre	SAP	2	0	1.4	0	1.2		Contrast Group...						Contrast Group...
Pre	SAP	2	0	0.9	0	0.4		1 2 3 4						1 2 3 4
Pre	SAP	2	0	2.9	0	2.8		pre v post B1 1 1 -1 -1						pre v post B1 1 1 -1 -1
Pre	SAP	2	0	2.7	0	0.7		ctl v sap B2 1 -1 1 -1						ctl v sap B2 1 -1 1 -1
Pre	SAP	2	0	3.7	0	1.9		int B3 1 -1 -1 1						int B3 1 -1 -1 1
Pre	SAP	2	0	1.2	0	0.6
Pre	SAP	2	0	2.5	0.2	1		Within contrast coefficients						Within contrast coefficients
Pre	SAP	2	0.1	2.8	0.1	1.7		Contrast Measurement...						Contrast Measurement...
Pre	SAP	2	0.1	3	0.1	6.1		1 2						1 2
Pre	SAP	2	0	2.4	0	4.8		dev v ndev W1 1 -1						dev v ndev W1 1 -1
Pre	SAP	2	0	1.3	0	5.5
Pre	SAP	2	0	2.3	0.1	0.2		Means and Standard Deviations						Means and Standard Deviations
Pre	SAP	2	0	4.6	0.5	4.1		Group 1 Overall Mean: 1.279						Group 1 Overall Mean: 1.304
Pre	SAP	2	0	3.3	0	3.3		Measurement 1 2						Measurement 1 2
Post	CTRL	3	0.1	2.9	0.4	0.6		Mean 0.057 2.500						Mean 0.014 2.593
Post	CTRL	3	0	3.3	0	1		SD 0.160 1.567						SD 0.053 2.159
Post	CTRL	3	0	3	0.3	2.2
Post	CTRL	3	0	2.9	0	1.2		Group 2 Overall Mean: 1.247						Group 2 Overall Mean: 1.190
Post	CTRL	3	0	2.9	0	4.1		Measurement 1 2						Measurement 1 2
Post	CTRL	3	0	2.1	0	3.6		Mean 0.013 2.480						Mean 0.067 2.313
Post	CTRL	3	0	2.3	0	1.3		SD 0.035 1.002						SD 0.135 1.999
Post	CTRL	3	0	3.2	0	1.6
Post	CTRL	3	0.1	0.5	0	1.2		Group 3 Overall Mean: 1.227						Group 3 Overall Mean: 1.138
Post	CTRL	3	0	1.9	0	4.2		Measurement 1 2						Measurement 1 2
Post	CTRL	3	0.1	5.2	0	3.7		Mean 0.023 2.431						Mean 0.054 2.223
Post	CTRL	3	0	1.3	0	0		SD 0.044 1.318						SD 0.133 1.523
Post	CTRL	3	0	0.1	0	4.2
Post	SAP	4	0.3	3	0	0.6		Group 4 Overall Mean: 1.563						Group 4 Overall Mean: 1.380
Post	SAP	4	0	7.9	0	6.3		Measurement 1 2						Measurement 1 2
Post	SAP	4	0.1	2.4	0	0.6		Mean 0.033 3.093						Mean 0.067 2.693
Post	SAP	4	0	4.9	0.6	4.6		SD 0.082 1.954						SD 0.159 1.615
Post	SAP	4	0.1	2.3	0	2.7
Post	SAP	4	0	1.6	0	2.4		Means and SDs averaged across groups						Means and SDs averaged across groups
Post	SAP	4	0	5.1	0	3.6		Measurement 1 2						Measurement 1 2
Post	SAP	4	0	2.5	0	4		Mean 0.032 2.626						Mean 0.050 2.456
Post	SAP	4	0	1.2	0	1.6		SD 0.094 1.506						SD 0.127 1.847
Post	SAP	4	0	1	0	3.4		--------------------------------						--------------------------------
Post	SAP	4	0	4.2	0.2	2
Post	SAP	4	0	2.2	0.1	2.8		Analysis of Variance Summary Table						Analysis of Variance Summary Table
Post	SAP	4	0	2.9	0	2.6
Post	SAP	4	0	4.7	0	3		Source SS df MS F						Source SS df MS F
Post	SAP	4	0	0.5	0.1	0.2		------------------------------------------------						------------------------------------------------
								Between						Between
								------------------------------------------------						------------------------------------------------
								pre v post B1 0.499 1 0.499 0.435						pre v post B1 0.004 1 0.004 0.003
								ctl v sap B2 0.658 1 0.658 0.574						ctl v sap B2 0.116 1 0.116 0.067
								int B3 0.963 1 0.963 0.840						int B3 0.895 1 0.895 0.515
								Error 60.763 53 1.146						Error 92.166 53 1.739
								------------------------------------------------						------------------------------------------------
								Within						Within
								------------------------------------------------						------------------------------------------------
								dev v ndev W1 191.147 1 191.147 168.941						dev v ndev W1 164.308 1 164.308 97.247
								B1W1 0.553 1 0.553 0.489						B1W1 0.002 1 0.002 0.001
								B2W1 0.811 1 0.811 0.717						B2W1 0.028 1 0.028 0.017
								B3W1 0.701 1 0.701 0.620						B3W1 1.106 1 1.106 0.655
								Error 59.966 53 1.131						Error 89.549 53 1.690
								------------------------------------------------						------------------------------------------------
