# Supplementary material for: Inhibition of noradrenergic signalling in rodent orbitofrontal cortex impairs the updating of goal-directed actions
Source: eLife. 2023 Feb 20;12:e81623. doi: 10.7554/eLife.81623 (PMC9988255; doi:10.7554/eLife.81623)
Supplement: Figure 1—source data 1. — This excel file contains the raw data from the quantification of DβH-positive fibres in the VO, LO, and Area 32 dorsal (A32d) and ventral (A32v). Behavioural data from initial and reversal phases are also supplied. [file elife-81623-fig1-data1.xlsx]

## Sheet: Fig 1B-C
					==========================================		====================================
Group	VO	LO	A32d+A32v		PSY		PSY
Control	3.47343	3.20733	2.82199		==========================================		====================================
Control	4.60467	3.8166	3.33965		Title: Control vs Saporin OFC subregions		Title: Control vs saporin: area 32
Control	4.01463	2.67907	2.20244		Date: 18/07/2022 Time: 12:07:48		Date: 22/09/2022 Time: 14:28:26
Control	5.41593	4.54113	2.84421		------------------------------------------		------------------------------------
Control	3.7681	3.21273	3.75852
Control	3.60673	3.29937	3.70767		Number of Groups: 2		Number of Groups: 2
Control	4.8053	4.48007	2.54212		Number of Measurements: 2		Number of Measurements: 1
Control	5.10177	4.7182	2.02209
Control	2.82613	2.52483	3.02595		Number of subjects in...		Number of subjects in...
Control	4.31293	4.31737	2.61523		Group 1: 26		Group 1: 26
Control	4.27117	3.3511	2.63312		Group 2: 29		Group 2: 29
Control	2.7074	2.52167	2.69837
Control	3.92367	3.0991	2.51741		Between contrast coefficients		Between contrast coefficients
Control	2.1796	2.05847	2.38817		Contrast Group...		Contrast Group...
Control	2.6898	2.1155	3.55245		1 2		1 2
Control	2.51557	2.60593	3.36353		B1 1 -1		B1 1 -1
Control	4.16	4.3624	4.26379		B2 1 0
Control	3.2421	2.61767	4.46638		B3 0 1		Means and Standard Deviations
Control	2.39863	2.26603	2.91145				Group 1 Overall Mean: 2.983
Control	2.1984	1.38105	3.52759		*** Caution ***		Measurement 1
Control	4.2858	2.49163	3.96747		B2 coefficients do not sum to zero		Mean 2.983
Control	3.25335	2.41177	4.54427		B3 coefficients do not sum to zero		SD 0.972
Control	0	1.768	3.10247
Control	2.6293	2.4162	3.86161		Within contrast coefficients		Group 2 Overall Mean: 0.597
Control	2.81825	2.8368	2.9888		Contrast Measurement...		Measurement 1
Control	3.4114	2.6133	0		1 2		Mean 0.597
Saporin	0.430533	0.1938	0.375251		W1 1 -1		SD 0.243
Saporin	0.1225	0.180567	0.667974		W2 1 0
Saporin	0.119933	0.104833	0.591601		W3 0 1		Means and SDs averaged across groups
Saporin	0.114067	0.161367	0.30281				Measurement 1
Saporin	0.229667	0.178	0.823464		*** Caution ***		Mean 1.790
Saporin	0.211233	0.1138	0.388641		W2 coefficients do not sum to zero		SD 0.691
Saporin	0.201	0.241433	0.490131		W3 coefficients do not sum to zero		--------------------
Saporin	0.172333	0.168033	0.23183
Saporin	0.1398	0.1704	1.18803		Means and Standard Deviations		Analysis of Variance Summary Table
Saporin	0.344667	0.286733	0.485011		Group 1 Overall Mean: 3.199
Saporin	0.250267	0.2174	0.447242		Measurement 1 2		Source SS df MS F
Saporin	0.262133	0.321533	0.631776		Mean 3.408 2.990		------------------------------------------------
Saporin	0.1554	0.280833	0.541157		SD 1.144 0.903		Between
Saporin	0.203833	0.0772667	0.70115				------------------------------------------------
Saporin	0.253567	0.184833	0.565643		Group 2 Overall Mean: 0.160		B1 78.066 1 78.066 163.642
Saporin	0.05075	0.0689	0.505843		Measurement 1 2		Error 25.284 53 0.477
Saporin	0.02755	0.0652	0.946222		Mean 0.160 0.161		------------------------------------------------
Saporin	0.0766667	0.0701333	0.461194		SD 0.096 0.078
Saporin	0.1202	0.146	0.725031
Saporin	0.1041	0.0931333	0.659656		Means and SDs averaged across groups
Saporin	0.0598	0.106233	0.494597		Measurement 1 2
Saporin	0.06095	0.04805	0.743861		Mean 1.784 1.575
Saporin	0.0479	0.05375	0.493264		SD 0.789 0.623
Saporin	0.228167	0.262467	0.645111		--------------------------------
Saporin	0.0627333	0.061	0.820898
Saporin	0.1615	0.201667	0.570016		Analysis of Variance Summary Table
Saporin	0.0932667	0.166133	0.521275
Saporin	0.256967	0.260067	0.836961		Source SS df MS F
Saporin	0.0892	0.192667	0.496235		------------------------------------------------
					Between
					------------------------------------------------
					B1 253.170 1 253.170 277.325
					B2 532.160 1 532.160 582.934
					B3 1.491 1 1.491 1.633
					Error 48.384 53 0.913
					------------------------------------------------
					Within
					------------------------------------------------
					W1 1.195 1 1.195 12.246
					B1W1 1.210 1 1.210 12.408
					B2W1 2.281 1 2.281 23.378
					B3W1 0.000 1 0.000 0.000
					Error 5.170 53 0.098
					W2 174.537 1 174.537 280.479
					B1W2 144.696 1 144.696 232.525
					B2W2 302.058 1 302.058 485.405
					B3W2 0.739 1 0.739 1.188
					Error 32.981 53 0.622
					W3 136.085 1 136.085 350.577
					B1W3 109.685 1 109.685 282.566
					B2W3 232.383 1 232.383 598.658
					B3W3 0.752 1 0.752 1.937
					Error 20.573 53 0.388
					------------------------------------------------

## Sheet: Fig 1D
Initial training					Session													==================================
	Group	Treat	Rat #	Group label	1	2	3	4	5	6	7	8	9	10	11	12		PSY
	Pre	CTL	13	1	1.44455	6.99811	9.71317	14.2019	17.5681	20.1137	16.8	14.8805	18.9003	17.85	15.7	18.3749		==================================
	Pre	CTL	15	1	1.89097	10.6445	10.3359	23.5325	31.8969	34.0458	36.6712	41.6282	43.5769	47.6109	43.6345	50.8746		Date: 13/02/2023 Time: 10:12:02
	Pre	CTL	16	1	3.31756	9.57886	12.1707	22.7433	26.4225	24.6928	36.5256	41.113	45.6144	49.1551	49.4822	48.2055		----------------------------------
	Pre	CTL	17	1	5.26217	13.8618	15.9089	26.0759	34.0928	38.0239	37.4814	38.9478	41.1377	43.549	50.1201	53.7133
	Pre	CTL	18	1	4.72201	4.11098	5.18993	11.6713	16.1864	20.3376	24.7171	32.4765	40.5712	46.0316	45.7666	50.6255		Number of Groups: 4
	Pre	CTL	19	1	1.80507	11.0389	11.4654	20.5283	21.1356	20.6586	24.2273	22.2184	28.0644	20.2749	19.375	24.498		Number of Measurements: 12
	Pre	CTL	20	1	3.25747	9.83135	10.9111	22.977	30.866	33.3139	37.8923	42.9106	45.7449	52.8681	54.1738	58.5826
	Pre	CTL	21	1	6.95427	9.85061	16.0544	15.0609	30.1709	31.0989	34.7999	41.7339	38.649	48.277	51.4425	49.5602		Number of subjects in...
	Pre	CTL	23	1	5.1885	13.8047	15.4119	23.7062	30.4698	40.5426	31.654	43.4813	39.8535	38.9526	25.2249	36.6648		Group 1: 14
	Pre	CTL	24	1	1.08812	3.96466	7.63161	10.6939	17.8487	22.057	22.3644	31.1963	39.0291	35.0484	45.8639	46.4283		Group 2: 15
	Pre	CTL	25	1	4.06123	15.1718	14.7546	34.86	44.8497	42.0523	48.7319	47.9344	53.8033	51.5344	65.0803	52.2678		Group 3: 13
	Pre	CTL	26	1	0.299999	2.1922	9.5414	13.5967	19.9455	26.6777	29.7387	30.9156	31.9378	36.8402	37.7166	42.9818		Group 4: 15
	Pre	CTL	27	1	3.1238	8.00634	6.73023	14.2232	14.7369	29.9316	28.2438	37.0246	26.5104	32.4825	22.55	9.89025
	Pre	CTL	28	1	5.54839	15.5986	16.3637	30.5077	37.1723	43.9053	52.5471	53.206	63.5552	57.1425	69.124	69.3791		Between contrast coefficients
	Pre	SAP	14	2	0.249999	0	2.87391	6.35161	14.8551	21.4427	27.2225	19.6215	27.6118	28.1159	29.6997	35.431		Contrast Group...
	Pre	SAP	16	2	0.59275	12.3774	9.90482	17.1609	27.5796	34.7762	31.3051	36.5357	46.4479	49.638	55.1784	48.5079		1 2 3 4
	Pre	SAP	17	2	1.29899	5.02108	6.16886	10.4393	15.1775	18.6766	17.95	18.0428	20.2229	24.0999	20.4499	25.1		pre v post B1 1 1 -1 -1
	Pre	SAP	18	2	3.53016	10.6249	10.1918	22.5898	30.2188	32.8791	32.353	33.5323	38.8653	39.7209	42.7593	45.8856		ctl v sap B2 1 -1 1 -1
	Pre	SAP	19	2	0.0249997	1.71099	7.75905	15.4693	17.4976	20.5638	20.0874	20.8224	28.4171	32.7038	34.7095	42.5315		int B3 1 -1 -1 1
	Pre	SAP	21	2	0.025	4.18941	11.6138	17.8105	24.843	26.692	29.3396	31.5416	38.8019	47.3843	43.8621	47.3481
	Pre	SAP	22	2	4.65612	4.95584	16.5094	23.2224	31.7971	33.2906	30.0582	33.6111	41.3205	33.325	35.0553	37.0379		Within contrast coefficients
	Pre	SAP	23	2	3.0259	8.38922	8.18472	18.9555	28.8793	35.1137	36.7559	35.7709	46.7667	51.3336	55.4727	65.0856		Contrast Measurement...
	Pre	SAP	24	2	7.04222	6.71344	14.0603	24.5439	32.7136	36.6723	42.5322	49.5458	50.4092	53.756	55.483	47.6541		1 2 3 4 5 6 7 8 9 10 11 12
	Pre	SAP	25	2	3.30815	12.1454	11.1603	22.1158	23.2584	29.5734	34.1829	45.0231	47.6557	47.9807	54.0408	55.3081		W1 -11 -9 -7 -5 -3 -1 1 3 5 7 9 11
	Pre	SAP	26	2	1.40143	13.974	14.8388	20.4874	35.7135	32.1543	37.5356	41.1696	44.1668	37.0332	40.1679	48.143
	Pre	SAP	27	2	6.42303	13.0723	14.3163	22.2522	0.125	23.1478	24.7301	38.0057	39.7921	44.6054	41.5693	49.6804		Means and Standard Deviations
	Pre	SAP	28	2	5.67316	8.69713	3.12928	20.2025	31.2412	41.5586	39.9158	45.0012	45.5535	41.0252	45.3583	46.958		Group 1 Overall Mean: 28.297
	Pre	SAP	31	2	4.06523	10.7863	9.91303	23.2092	27.1758	34.7904	35.9459	43.5096	46.1317	53.854	58.8321	62.2588		Measurement 1 2 3 4 5 6 7 8 9 10 11 12
	Pre	SAP	32	2	2.08974	0.999998	1.65356	11.3607	13.6857	22.4052	36.9927	40.9537	45.3053	54.3144	46.6553	60.0397		Mean 3.426 9.617 11.584 20.313 26.670 30.532 33.028 37.119 39.781 41.258 42.516 43.717
	Post	CTL	30	3	5.96982	8.44498	15.3372	20.2714	28.1814	29.0012	34.5409	40.2809	44.8537	39.614	38.4179	40.1178		SD 1.956 4.227 3.682 7.329 9.013 8.409 9.841 10.085 11.304 11.772 16.496 16.219
	Post	CTL	31	3	4.18604	5.62158	11.4398	19.9763	28.8246	34.5287	35.0684	32.3433	37.7915	31.125	42.4285	43.0801
	Post	CTL	34	3	0.692578	11.2549	16.3781	26.1338	30.3312	32.5227	31.3785	44.3764	47.0852	41.9222	40.3594	53.1599		Group 2 Overall Mean: 27.813
	Post	CTL	34	3	3.55241	1.89472	2.95743	13.245	18.321	23.4223	27.6681	38.4142	42.2872	49.6323	49.9022	51.3277		Measurement 1 2 3 4 5 6 7 8 9 10 11 12
	Post	CTL	36	3	1.31778	7.30153	5.79441	5.68649	15.7932	31.2894	27.3371	25.0495	40.2619	25.175	32.7458	29.2942		Mean 2.894 7.577 9.484 18.411 23.652 29.582 31.795 35.512 40.499 42.592 43.953 47.799
	Post	CTL	36	3	0	3.02476	5.64896	11.3268	21.9037	28.2722	31.3186	33.8039	43.9206	36.1193	37.95	36.5929		SD 2.339 4.608 4.565 5.390 9.602 6.956 7.061 9.664 8.652 9.811 10.907 10.471
	Post	CTL	37	3	2.87345	8.2191	9.6723	21.67	27.7458	36.1345	40.5524	48.4976	44.1663	54.2984	57.623	66.9155
	Post	CTL	38	3	3.53399	1.94663	2.09083	18.0261	25.9833	39.697	41.6203	48.7823	53.996	58.8799	61.6504	63.9585		Group 3 Overall Mean: 26.959
	Post	CTL	40	3	6.64607	1.3049	2.26755	15.2593	22.1843	23.9991	33.7739	35.8999	29.0093	37.5069	32.7832	29.9109		Measurement 1 2 3 4 5 6 7 8 9 10 11 12
	Post	CTL	40	3	2.62567	8.62945	10.8822	20.0099	25.9019	32.2489	37.676	35.0929	35.5136	47.57	44.5078	49.3769		Mean 3.079 5.775 8.481 16.927 23.367 29.734 33.276 36.520 40.298 40.234 40.695 45.118
	Post	CTL	42	3	4.17459	11.553	11.9134	20.7338	29.7411	33.3687	39.113	33.3337	39.1713	36.3107	31.075	41.4733		SD 2.115 3.717 4.682 5.790 5.983 5.917 5.483 7.387 7.112 9.848 10.431 12.255
	Post	CTL	43	3	0.0249999	1.28393	8.2373	19.1711	16.5945	21.3914	28.214	26.9545	27.7512	31.4107	27.65	30.323
	Post	CTL	44	3	4.44422	4.62555	7.63233	8.53081	12.2896	20.6746	24.33	31.9542	38.0725	33.469	31.95	51.0017		Group 4 Overall Mean: 25.392
	Post	SAP	29	4	6.93057	13.5857	15.272	23.3955	36.6149	38.0712	31.5748	34.5938	42.0299	36.1	35.9794	30.625		Measurement 1 2 3 4 5 6 7 8 9 10 11 12
	Post	SAP	32	4	11.3705	17.2594	19.6228	32.5179	36.8999	46.1614	54.9426	49.43	63.7201	55.1129	73.3514	80.418		Mean 4.596 9.624 10.439 19.189 25.153 28.361 30.199 29.598 34.837 34.429 36.903 41.373
	Post	SAP	33	4	7.34601	16.5219	15.983	23.4009	37.6706	43.9149	42.6258	38.3277	39.1768	38.0578	42.2625	52.7915		SD 2.960 5.319 5.684 6.904 9.571 11.785 10.482 10.481 12.476 10.888 16.656 17.905
	Post	SAP	33	4	3.89885	9.06008	6.92546	12.7412	19.7797	25.62	26.3597	27.3377	34.0641	33.4389	33.6999	32.9269
	Post	SAP	35	4	3.28667	4.44806	8.14777	10.8135	11.4647	16.1722	20.321	16.0741	15.9672	16.2	19.2052	21.2179		Means and SDs averaged across groups
	Post	SAP	35	4	0	0.774333	9.27174	11.1415	15.1895	19.0522	20.3657	23.0297	22.2222	24.625	25.626	24.7415		Measurement 1 2 3 4 5 6 7 8 9 10 11 12
	Post	SAP	37	4	4.05164	5.85886	6.75967	16.3053	20.2009	24.035	22.8389	28.291	36.2445	40.0381	37.4232	39.3842		Mean 3.499 8.148 9.997 18.710 24.710 29.552 32.074 34.687 38.854 39.628 41.017 44.502
	Post	SAP	38	4	3.38281	11.5133	18.0034	26.1972	30.7339	30.1163	35.9363	33.6096	39.6276	33.0912	34.1708	38.4815		SD 2.390 4.538 4.725 6.406 8.751 8.645 8.530 9.539 10.183 10.616 14.003 14.566
	Post	SAP	39	4	1.53929	2.08959	4.43779	13.6305	14.5442	16.0788	19.7895	16.1516	19.5086	26.5499	18.925	26.25		--------------------------------------------------------------------------------------------------------------------------------------------------------
	Post	SAP	39	4	3.28422	12.2108	2.89571	18.0743	23.6227	35.9948	36.1825	43.1081	46.9551	52.4605	59.2152	73.0114
	Post	SAP	41	4	8.88603	15.5719	17.6786	25.0162	33.4768	36.6079	38.7901	29.2247	30.7057	37.5419	33.4656	35.75		Analysis of Variance Summary Table
	Post	SAP	41	4	5.63304	7.75415	8.50521	18.0139	22.6309	26.5265	24.2155	23.2316	28.4278	28.425	30.3249	33.2499
	Post	SAP	42	4	4.06905	10.325	10.9119	20.496	27.9218	8.3589	19.612	27.8746	33.3291	31.8	37.0999	41.2551		Source SS df MS F
	Post	SAP	43	4	2.82874	13.5312	10.3991	26.6471	35.1141	42.4772	37.0417	40.4913	47.3371	43.6664	60.8045	62.4752		------------------------------------------------
	Post	SAP	44	4	2.42661	3.86032	1.77193	9.42904	11.4456	16.236	22.3791	13.21	23.2195	19.325	12	28.0246		Between
																		------------------------------------------------
																		pre v post B1 601.885 1 601.885 0.963
																		ctl v sap B2 179.244 1 179.244 0.287
																		int B3 49.934 1 49.934 0.080
																		Error 33140.122 53 625.285
																		------------------------------------------------
																		Within
																		------------------------------------------------
																		W1 117428.229 1 117428.229 508.300
																		B1W1 271.841 1 271.841 1.177
																		B2W1 95.909 1 95.909 0.415
																		B3W1 852.143 1 852.143 3.689
																		Error 12244.139 53 231.021
																		------------------------------------------------

## Sheet: Fig 1E
Initial training					Training session													===========================================	Initial test									=======================================
	Group	Treat	Rat #	Group label	1	2	3	4	5	6	7	8	9	10	11	12		PSY		Group	Treat	Rat #	Group label	Consump (Dev)	Dev (lever)	Ndev (lever)		PSY
	Pre	CTL	13	1	1.44455	6.99811	9.71317	14.2019	17.5681	20.1137	16.8	14.8805	18.9003	17.85	15.7	18.3749		===========================================		Pre	CTL	13	1	11.6	0.399799	4.19789		=======================================
	Pre	CTL	15	1	1.89097	10.6445	10.3359	23.5325	31.8969	34.0458	36.6712	41.6282	43.5769	47.6109	43.6345	50.8746		Title: Initial training control v saporin		Pre	CTL	15	1	8.6	0	0		Title: Initial test control v saporin
	Pre	CTL	16	1	3.31756	9.57886	12.1707	22.7433	26.4225	24.6928	36.5256	41.113	45.6144	49.1551	49.4822	48.2055		Date: 18/07/2022 Time: 12:29:05		Pre	CTL	16	1	8.5	2.39874	19.2899		Date: 18/07/2022 Time: 12:30:14
	Pre	CTL	17	1	5.26217	13.8618	15.9089	26.0759	34.0928	38.0239	37.4814	38.9478	41.1377	43.549	50.1201	53.7133		-------------------------------------------		Pre	CTL	17	1	16	0	24.1857		---------------------------------------
	Pre	CTL	18	1	4.72201	4.11098	5.18993	11.6713	16.1864	20.3376	24.7171	32.4765	40.5712	46.0316	45.7666	50.6255				Pre	CTL	18	1	7.7	0.399783	13.4927
	Pre	CTL	19	1	1.80507	11.0389	11.4654	20.5283	21.1356	20.6586	24.2273	22.2184	28.0644	20.2749	19.375	24.498		Number of Groups: 4		Pre	CTL	19	1	16	0	8.69477		Number of Groups: 4
	Pre	CTL	20	1	3.25747	9.83135	10.9111	22.977	30.866	33.3139	37.8923	42.9106	45.7449	52.8681	54.1738	58.5826		Number of Measurements: 12		Pre	CTL	20	1	13.5	0.199888	18.9894		Number of Measurements: 2
	Pre	CTL	21	1	6.95427	9.85061	16.0544	15.0609	30.1709	31.0989	34.7999	41.7339	38.649	48.277	51.4425	49.5602				Pre	CTL	21	1	12.7	0.299849	6.19688
	Pre	CTL	23	1	5.1885	13.8047	15.4119	23.7062	30.4698	40.5426	31.654	43.4813	39.8535	38.9526	25.2249	36.6648		Number of subjects in...		Pre	CTL	23	1	16	0.599689	9.59503		Number of subjects in...
	Pre	CTL	24	1	1.08812	3.96466	7.63161	10.6939	17.8487	22.057	22.3644	31.1963	39.0291	35.0484	45.8639	46.4283		Group 1: 14		Pre	CTL	24	1	9.6	3.59792	17.29		Group 1: 14
	Pre	CTL	25	1	4.06123	15.1718	14.7546	34.86	44.8497	42.0523	48.7319	47.9344	53.8033	51.5344	65.0803	52.2678		Group 2: 15		Pre	CTL	25	1	9	3.29785	9.39386		Group 2: 15
	Pre	CTL	26	1	0.299999	2.1922	9.5414	13.5967	19.9455	26.6777	29.7387	30.9156	31.9378	36.8402	37.7166	42.9818		Group 3: 13		Pre	CTL	26	1	12.2	1.89898	10.4944		Group 3: 13
	Pre	CTL	27	1	3.1238	8.00634	6.73023	14.2232	14.7369	29.9316	28.2438	37.0246	26.5104	32.4825	22.55	9.89025		Group 4: 15		Pre	CTL	27	1	3.9	0.2998	11.1925		Group 4: 15
	Pre	CTL	28	1	5.54839	15.5986	16.3637	30.5077	37.1723	43.9053	52.5471	53.206	63.5552	57.1425	69.124	69.3791				Pre	CTL	28	1	16.4	7.39578	15.3912
	Pre	SAP	14	2	0.249999	0	2.87391	6.35161	14.8551	21.4427	27.2225	19.6215	27.6118	28.1159	29.6997	35.431		Between contrast coefficients		Pre	SAP	14	2	7.2	0	12.7934		Between contrast coefficients
	Pre	SAP	16	2	0.59275	12.3774	9.90482	17.1609	27.5796	34.7762	31.3051	36.5357	46.4479	49.638	55.1784	48.5079		Contrast Group...		Pre	SAP	16	2	3.7	0	8.19521		Contrast Group...
	Pre	SAP	17	2	1.29899	5.02108	6.16886	10.4393	15.1775	18.6766	17.95	18.0428	20.2229	24.0999	20.4499	25.1		1 2 3 4		Pre	SAP	17	2	6.7	0.199892	6.69638		1 2 3 4
	Pre	SAP	18	2	3.53016	10.6249	10.1918	22.5898	30.2188	32.8791	32.353	33.5323	38.8653	39.7209	42.7593	45.8856		pre v post B1 1 1 -1 -1		Pre	SAP	18	2	11.7	0	4.29744		pre v post B1 1 1 -1 -1
	Pre	SAP	19	2	0.0249997	1.71099	7.75905	15.4693	17.4976	20.5638	20.0874	20.8224	28.4171	32.7038	34.7095	42.5315		ctl v sap B2 1 -1 1 -1		Pre	SAP	19	2	10.7	0	0		ctl v sap B2 1 -1 1 -1
	Pre	SAP	21	2	0.025	4.18941	11.6138	17.8105	24.843	26.692	29.3396	31.5416	38.8019	47.3843	43.8621	47.3481		interaction B3 1 -1 -1 1		Pre	SAP	21	2	9.6	0.499733	16.791		interaction B3 1 -1 -1 1
	Pre	SAP	22	2	4.65612	4.95584	16.5094	23.2224	31.7971	33.2906	30.0582	33.6111	41.3205	33.325	35.0553	37.0379				Pre	SAP	22	2	7.8	1.49923	8.19579
	Pre	SAP	23	2	3.0259	8.38922	8.18472	18.9555	28.8793	35.1137	36.7559	35.7709	46.7667	51.3336	55.4727	65.0856		Within contrast coefficients		Pre	SAP	23	2	9.4	8.29529	15.6911		Within contrast coefficients
	Pre	SAP	24	2	7.04222	6.71344	14.0603	24.5439	32.7136	36.6723	42.5322	49.5458	50.4092	53.756	55.483	47.6541		Contrast Measurement...		Pre	SAP	24	2	10	1.69911	23.6876		Contrast Measurement...
	Pre	SAP	25	2	3.30815	12.1454	11.1603	22.1158	23.2584	29.5734	34.1829	45.0231	47.6557	47.9807	54.0408	55.3081		1 2 3 4 5 6 7 8 9 10 11 12		Pre	SAP	25	2	10.2	6.39664	18.1905		1 2
	Pre	SAP	26	2	1.40143	13.974	14.8388	20.4874	35.7135	32.1543	37.5356	41.1696	44.1668	37.0332	40.1679	48.143		linear W1 -11 -9 -7 -5 -3 -1 1 3 5 7 9 11		Pre	SAP	26	2	10.3	2.29848	19.8868		dev v ndeval W1 1 -1
	Pre	SAP	27	2	6.42303	13.0723	14.3163	22.2522	0.125	23.1478	24.7301	38.0057	39.7921	44.6054	41.5693	49.6804				Pre	SAP	27	2	10	1.89893	25.6856
	Pre	SAP	28	2	5.67316	8.69713	3.12928	20.2025	31.2412	41.5586	39.9158	45.0012	45.5535	41.0252	45.3583	46.958		Means and Standard Deviations		Pre	SAP	28	2	7.2	5.1965	12.2917		Means and Standard Deviations
	Pre	SAP	31	2	4.06523	10.7863	9.91303	23.2092	27.1758	34.7904	35.9459	43.5096	46.1317	53.854	58.8321	62.2588		Group 1 Overall Mean: 28.297		Pre	SAP	31	2	8.7	0.0999419	12.8925		Group 1 Overall Mean: 6.761
	Pre	SAP	32	2	2.08974	0.999998	1.65356	11.3607	13.6857	22.4052	36.9927	40.9537	45.3053	54.3144	46.6553	60.0397		Measurement 1 2 3 4 5 6 7 8 9 10 11 12		Pre	SAP	32	2	7.9	2.79834	12.9923		Measurement 1 2
	Post	CTL	30	3	5.96982	8.44498	15.3372	20.2714	28.1814	29.0012	34.5409	40.2809	44.8537	39.614	38.4179	40.1178		Mean 3.426 9.617 11.584 20.313 26.670 30.532 33.028 37.119 39.781 41.258 42.516 43.717		Post	CTL	30	3	8.6	18.3903	3.29826		Mean 1.486 12.036
	Post	CTL	31	3	4.18604	5.62158	11.4398	19.9763	28.8246	34.5287	35.0684	32.3433	37.7915	31.125	42.4285	43.0801		SD 1.956 4.227 3.682 7.329 9.013 8.409 9.841 10.085 11.304 11.772 16.496 16.219		Post	CTL	31	3	10.4	0.199886	12.3929		SD 2.112 6.550
	Post	CTL	34	3	0.692578	11.2549	16.3781	26.1338	30.3312	32.5227	31.3785	44.3764	47.0852	41.9222	40.3594	53.1599				Post	CTL	34	3	12.7	7.2958	10.494
	Post	CTL	34	3	3.55241	1.89472	2.95743	13.245	18.321	23.4223	27.6681	38.4142	42.2872	49.6323	49.9022	51.3277		Group 2 Overall Mean: 27.813		Post	CTL	34	3	9.2	0.699573	13.4918		Group 2 Overall Mean: 7.643
	Post	CTL	36	3	1.31778	7.30153	5.79441	5.68649	15.7932	31.2894	27.3371	25.0495	40.2619	25.175	32.7458	29.2942		Measurement 1 2 3 4 5 6 7 8 9 10 11 12		Post	CTL	36	3	3.1	8.69487	6.99587		Measurement 1 2
	Post	CTL	36	3	0	3.02476	5.64896	11.3268	21.9037	28.2722	31.3186	33.8039	43.9206	36.1193	37.95	36.5929		Mean 2.894 7.577 9.484 18.411 23.652 29.582 31.795 35.512 40.499 42.592 43.953 47.799		Post	CTL	36	3	8.2	1.89898	16.891		Mean 2.060 13.227
	Post	CTL	37	3	2.87345	8.2191	9.6723	21.67	27.7458	36.1345	40.5524	48.4976	44.1663	54.2984	57.623	66.9155		SD 2.339 4.608 4.565 5.390 9.602 6.956 7.061 9.664 8.652 9.811 10.907 10.471		Post	CTL	37	3	3.9	2.89848	28.685		SD 2.611 7.083
	Post	CTL	38	3	3.53399	1.94663	2.09083	18.0261	25.9833	39.697	41.6203	48.7823	53.996	58.8799	61.6504	63.9585				Post	CTL	38	3	6	4.99711	15.9908
	Post	CTL	40	3	6.64607	1.3049	2.26755	15.2593	22.1843	23.9991	33.7739	35.8999	29.0093	37.5069	32.7832	29.9109		Group 3 Overall Mean: 26.959		Post	CTL	40	3	9.2	0.499721	6.69626		Group 3 Overall Mean: 8.496
	Post	CTL	40	3	2.62567	8.62945	10.8822	20.0099	25.9019	32.2489	37.676	35.0929	35.5136	47.57	44.5078	49.3769		Measurement 1 2 3 4 5 6 7 8 9 10 11 12		Post	CTL	40	3	14.2	0.499699	12.8922		Measurement 1 2
	Post	CTL	42	3	4.17459	11.553	11.9134	20.7338	29.7411	33.3687	39.113	33.3337	39.1713	36.3107	31.075	41.4733		Mean 3.079 5.775 8.481 16.927 23.367 29.734 33.276 36.520 40.298 40.234 40.695 45.118		Post	CTL	42	3	9.3	4.69728	7.69555		Mean 4.369 12.623
	Post	CTL	43	3	0.0249999	1.28393	8.2373	19.1711	16.5945	21.3914	28.214	26.9545	27.7512	31.4107	27.65	30.323		SD 2.115 3.717 4.682 5.790 5.983 5.917 5.483 7.387 7.112 9.848 10.431 12.255		Post	CTL	43	3	9.9	2.59848	6.79601		SD 4.982 6.998
	Post	CTL	44	3	4.44422	4.62555	7.63233	8.53081	12.2896	20.6746	24.33	31.9542	38.0725	33.469	31.95	51.0017				Post	CTL	44	3	9	3.3982	21.6885
	Post	SAP	29	4	6.93057	13.5857	15.272	23.3955	36.6149	38.0712	31.5748	34.5938	42.0299	36.1	35.9794	30.625		Group 4 Overall Mean: 25.392		Post	SAP	29	4	8.2	0.0999497	4.99748		Group 4 Overall Mean: 6.833
	Post	SAP	32	4	11.3705	17.2594	19.6228	32.5179	36.8999	46.1614	54.9426	49.43	63.7201	55.1129	73.3514	80.418		Measurement 1 2 3 4 5 6 7 8 9 10 11 12		Post	SAP	32	4	11	2.69848	24.1864		Measurement 1 2
	Post	SAP	33	4	7.34601	16.5219	15.983	23.4009	37.6706	43.9149	42.6258	38.3277	39.1768	38.0578	42.2625	52.7915		Mean 4.596 9.624 10.439 19.189 25.153 28.361 30.199 29.598 34.837 34.429 36.903 41.373		Post	SAP	33	4	13.4	0	24.9858		Mean 2.920 10.747
	Post	SAP	33	4	3.89885	9.06008	6.92546	12.7412	19.7797	25.62	26.3597	27.3377	34.0641	33.4389	33.6999	32.9269		SD 2.960 5.319 5.684 6.904 9.571 11.785 10.482 10.481 12.476 10.888 16.656 17.905		Post	SAP	33	4	9.6	12.1927	7.59544		SD 3.952 6.974
	Post	SAP	35	4	3.28667	4.44806	8.14777	10.8135	11.4647	16.1722	20.321	16.0741	15.9672	16.2	19.2052	21.2179				Post	SAP	35	4	4.5	0	5.49678
	Post	SAP	35	4	0	0.774333	9.27174	11.1415	15.1895	19.0522	20.3657	23.0297	22.2222	24.625	25.626	24.7415		Means and SDs averaged across groups		Post	SAP	35	4	9.2	0.999475	11.6939		Means and SDs averaged across groups
	Post	SAP	37	4	4.05164	5.85886	6.75967	16.3053	20.2009	24.035	22.8389	28.291	36.2445	40.0381	37.4232	39.3842		Measurement 1 2 3 4 5 6 7 8 9 10 11 12		Post	SAP	37	4	8.4	5.29696	7.59565		Measurement 1 2
	Post	SAP	38	4	3.38281	11.5133	18.0034	26.1972	30.7339	30.1163	35.9363	33.6096	39.6276	33.0912	34.1708	38.4815		Mean 3.499 8.148 9.997 18.710 24.710 29.552 32.074 34.687 38.854 39.628 41.017 44.502		Post	SAP	38	4	12.9	0.199894	16.2913		Mean 2.709 12.158
	Post	SAP	39	4	1.53929	2.08959	4.43779	13.6305	14.5442	16.0788	19.7895	16.1516	19.5086	26.5499	18.925	26.25		SD 2.390 4.538 4.725 6.406 8.751 8.645 8.530 9.539 10.183 10.616 14.003 14.566		Post	SAP	39	4	7.2	0	0		SD 3.555 6.907
	Post	SAP	39	4	3.28422	12.2108	2.89571	18.0743	23.6227	35.9948	36.1825	43.1081	46.9551	52.4605	59.2152	73.0114		--------------------------------------------------------------------------------------------------------------------------------------------------------		Post	SAP	39	4	10	0.599646	9.19458		--------------------------------
	Post	SAP	41	4	8.88603	15.5719	17.6786	25.0162	33.4768	36.6079	38.7901	29.2247	30.7057	37.5419	33.4656	35.75				Post	SAP	41	4	8.9	1.89893	16.7905
	Post	SAP	41	4	5.63304	7.75415	8.50521	18.0139	22.6309	26.5265	24.2155	23.2316	28.4278	28.425	30.3249	33.2499		Analysis of Variance Summary Table		Post	SAP	41	4	9.6	5.89641	8.49483		Analysis of Variance Summary Table
	Post	SAP	42	4	4.06905	10.325	10.9119	20.496	27.9218	8.3589	19.612	27.8746	33.3291	31.8	37.0999	41.2551				Post	SAP	42	4	11.6	10.6934	8.39485
	Post	SAP	43	4	2.82874	13.5312	10.3991	26.6471	35.1141	42.4772	37.0417	40.4913	47.3371	43.6664	60.8045	62.4752		Source SS df MS F		Post	SAP	43	4	9.1	2.79853	6.99632		Source SS df MS F
	Post	SAP	44	4	2.42661	3.86032	1.77193	9.42904	11.4456	16.236	22.3791	13.21	23.2195	19.325	12	28.0246		------------------------------------------------		Post	SAP	44	4	2.7	0.399764	8.39505		------------------------------------------------
																		Between										Between
																		------------------------------------------------										------------------------------------------------
																		pre v post B1 601.885 1 601.885 0.963										pre v post B1 6.081 1 6.081 0.213
																		ctl v sap B2 179.244 1 179.244 0.287										ctl v sap B2 4.322 1 4.322 0.152
																		interaction B3 49.934 1 49.934 0.080										interaction B3 46.004 1 46.004 1.614
																		Error 33140.122 53 625.285										Error 1510.562 53 28.501
																		------------------------------------------------										------------------------------------------------
																		Within										Within
																		------------------------------------------------										------------------------------------------------
																		linear W1 117428.229 1 117428.229 508.300										dev v ndeval W1 2535.859 1 2535.859 79.617
																		B1W1 271.841 1 271.841 1.177										B1W1 56.386 1 56.386 1.770
																		B2W1 95.909 1 95.909 0.415										B2W1 0.064 1 0.064 0.002
																		B3W1 852.143 1 852.143 3.689										B3W1 1.934 1 1.934 0.061
																		Error 12244.139 53 231.021										Error 1688.085 53 31.851
																		------------------------------------------------										------------------------------------------------

## Sheet: Fig 1F-G
Reversal training					Training session						============================================	Reversal test									========================================
	Group	Treat	Rat #	Group label	1	2	3	4	5		PSY		Group	Treat	Rat #	Group label	Consump (Dev)	Dev (lever)	Ndev (lever)		PSY
	Pre	CTL	13	1	14.1999	24	12.25	8.30002	20.7027		============================================		Pre	CTL	13	1	9.8	0.399795	5.59713		========================================
	Pre	CTL	15	1	45.7721	29.425	33.9065	54.5376	52.5768		Title: Reversal training control v saporin		Pre	CTL	15	1	5.5	0	0		Title: Reversal test control v saporin
	Pre	CTL	16	1	51.5886	47.4944	48.2802	51.2597	56.0732		Date: 18/07/2022 Time: 12:35:45		Pre	CTL	16	1	10.9	0	2.89851		Date: 18/07/2022 Time: 12:42:32
	Pre	CTL	17	1	44.9043	37.2531	32.942	30.9751	42.411		--------------------------------------------		Pre	CTL	17	1	11.1	0	0.599638		----------------------------------------
	Pre	CTL	18	1	72.9602	66.3958	74.6167	78.8105	81.0078				Pre	CTL	18	1	8.6	2.69852	0.99945
	Pre	CTL	19	1	24.802	25.7705	19.05	24.959	30.0621		Number of Groups: 4		Pre	CTL	19	1	5.7	0.399753	0.0999382		Number of Groups: 4
	Pre	CTL	20	1	70.4088	65.8272	63.3947	74.1339	80.7555		Number of Measurements: 5		Pre	CTL	20	1	8.3	4.5974	4.89723		Number of Measurements: 2
	Pre	CTL	21	1	39.1462	36.8975	42.004	30.3251	36.2998				Pre	CTL	21	1	2.7	0	13.0932
	Pre	CTL	23	1	15.3749	18.7499	22.25	25.1623	29.8797		Number of subjects in...		Pre	CTL	23	1	7.2	0	0		Number of subjects in...
	Pre	CTL	24	1	27.6	33.2689	40.7194	47.9411	49.8234		Group 1: 14		Pre	CTL	24	1	5.5	12.7925	14.0917		Group 1: 14
	Pre	CTL	25	1	73.1006	67.2316	68.3598	82.2109	75.2185		Group 2: 15		Pre	CTL	25	1	1.3	2.09867	11.1929		Group 2: 15
	Pre	CTL	26	1	43.1999	48.1699	51.4033	47.0746	49.8705		Group 3: 13		Pre	CTL	26	1	8.6	10.2946	6.4966		Group 3: 13
	Pre	CTL	27	1	28.2499	40.2103	40.1348	34.2498	41.8711		Group 4: 15		Pre	CTL	27	1	1.3	2.59832	12.5919		Group 4: 15
	Pre	CTL	28	1	82.0409	74.1178	83.5103	78.3393	79.2534				Pre	CTL	28	1	13.2	8.79529	21.1887
	Pre	SAP	14	2	24.7749	28.5	25.175	22.8	30.55		Between contrast coefficients		Pre	SAP	14	2	3.2	0	10.294		Between contrast coefficients
	Pre	SAP	16	2	40.2734	54.1479	44.0112	38.0225	59.6667		Contrast Group...		Pre	SAP	16	2	1.8	0	4.99703		Contrast Group...
	Pre	SAP	17	2	43.9845	40.6348	39.4442	26.5514	48.2477		1 2 3 4		Pre	SAP	17	2	3.7	0	4.29766		1 2 3 4
	Pre	SAP	18	2	34.2083	36.3278	47.4236	42.7734	47.3856		pre v post B1 1 1 -1 -1		Pre	SAP	18	2	2	0	0		pre v post B1 1 1 -1 -1
	Pre	SAP	19	2	43.1517	52.3481	49.2468	51.5638	50.0273		ctl v sap B2 1 -1 1 -1		Pre	SAP	19	2	4.6	0	0		ctl v sap B2 1 -1 1 -1
	Pre	SAP	21	2	34.0011	41.0111	40.0495	33.9039	37.3418		interaction B3 1 -1 -1 1		Pre	SAP	21	2	1.5	0.499733	0.199893		interaction B3 1 -1 -1 1
	Pre	SAP	22	2	34.6783	41.299	34.8809	30.5858	42.6106				Pre	SAP	22	2	3	21.3884	1.79903		ctl groups B4 1 0 1 0
	Pre	SAP	23	2	35.9449	31.533	30	32.7483	33.7047		Within contrast coefficients		Pre	SAP	23	2	8.2	4.19758	6.09648		sap groups B5 0 1 0 1
	Pre	SAP	24	2	49.4151	45.9271	51.321	56.258	56.6926		Contrast Measurement...		Pre	SAP	24	2	7.6	6.39602	8.29484
	Pre	SAP	25	2	51.6579	49.9161	52.9159	57.6857	62.6379		1 2 3 4 5		Pre	SAP	25	2	11.1	0.599691	6.09686		*** Caution ***
	Pre	SAP	26	2	64.4925	44.8962	51.8672	53.0488	54.2678		linear W1 -2 -1 0 1 2		Pre	SAP	26	2	7.6	9.09421	1.29917		B4 coefficients do not sum to zero
	Pre	SAP	27	2	52.614	63.2571	64.9172	61.1569	65.0101				Pre	SAP	27	2	11.4	8.2956	0.799576		B5 coefficients do not sum to zero
	Pre	SAP	28	2	52.0618	51.1804	58.7898	56.7295	63.5499		Means and Standard Deviations		Pre	SAP	28	2	13.1	3.59765	0.199869
	Pre	SAP	31	2	64.7042	56.6027	63.8839	61.8593	66.9032		Group 1 Overall Mean: 46.787		Pre	SAP	31	2	10.6	1.69907	1.89897		Within contrast coefficients
	Pre	SAP	32	2	79.8143	73.7996	76.164	80.9876	94.4135		Measurement 1 2 3 4 5		Pre	SAP	32	2	9.1	2.79847	1.49918		Contrast Measurement...
	Post	CTL	30	3	47.3376	42.6143	46.8452	48.7357	48.629		Mean 45.236 43.914 45.200 47.729 51.857		Post	CTL	30	3	2.7	1.09943	10.5945		1 2
	Post	CTL	31	3	12.9942	25.8787	4.69999	22.7499	28.286		SD 22.338 18.102 21.262 23.515 20.321		Post	CTL	31	3	2.6	0	0.0999474		dev v ndeval W1 1 -1
	Post	CTL	34	3	50.0421	53.5805	65.2467	63.49	63.2871				Post	CTL	34	3	6.1	1.29927	0.199888
	Post	CTL	34	3	54.9863	56.2219	50.5492	53.4442	56.6392		Group 2 Overall Mean: 48.889		Post	CTL	34	3	10.4	0.199886	0		Means and Standard Deviations
	Post	CTL	36	3	44.7311	43.5168	39.5147	39.775	46.3149		Measurement 1 2 3 4 5		Post	CTL	36	3	9.3	0.0999419	2.19872		Group 1 Overall Mean: 4.946
	Post	CTL	36	3	29.6627	26.7248	28.8999	26.9498	29.0736		Mean 47.060 47.413 48.667 47.120 54.187		Post	CTL	36	3	2.4	0.399785	1.2993		Measurement 1 2
	Post	CTL	37	3	74.3883	67.9432	57.8889	50.6732	59.6361		SD 14.514 11.923 13.797 16.207 16.012		Post	CTL	37	3	3.9	2.69861	14.5925		Mean 3.193 6.700
	Post	CTL	38	3	56.3713	69.3547	68.8256	67.9155	72.386				Post	CTL	38	3	8.2	17.4904	0.299836		SD 4.338 6.697
	Post	CTL	40	3	42.8552	52.4586	43.3256	41.5441	56.3945		Group 3 Overall Mean: 45.995		Post	CTL	40	3	5.9	3.69789	14.8915
	Post	CTL	40	3	34.1156	37.1407	37.6535	46.5978	46.1952		Measurement 1 2 3 4 5		Post	CTL	40	3	6.8	0.399779	0		Group 2 Overall Mean: 3.547
	Post	CTL	42	3	53.1634	56.5517	55.3931	49.7393	71.7168		Mean 43.954 47.192 43.885 44.354 50.592		Post	CTL	42	3	4	0.899487	7.29584		Measurement 1 2
	Post	CTL	43	3	19.9929	26.2357	17.7249	16.675	21.3749		SD 16.372 14.936 18.403 14.944 16.172		Post	CTL	43	3	4.8	0.0999424	14.2918		Mean 3.907 3.187
	Post	CTL	44	3	50.7387	55.2686	54.1459	48.4936	57.8397				Post	CTL	44	3	9.5	11.594	16.9913		SD 5.755 3.296
	Post	SAP	29	4	14.0499	24.2498	23.1499	30.2006	27.0579		Group 4 Overall Mean: 41.187		Post	SAP	29	4	5.5	0.199897	0
	Post	SAP	32	4	66.7031	76.0387	65.2427	68.6414	84.916		Measurement 1 2 3 4 5		Post	SAP	32	4	11.3	0.199894	5.39714		Group 3 Overall Mean: 4.723
	Post	SAP	33	4	58.9278	46.7403	45.6767	42.957	43.2133		Mean 40.227 41.300 39.173 41.940 43.293		Post	SAP	33	4	9.2	0.799558	2.69851		Measurement 1 2
	Post	SAP	33	4	53.1004	55.5709	56.8428	58.2532	53.7403		SD 21.314 20.252 20.119 19.930 21.458		Post	SAP	33	4	8.2	0.399784	0.099946		Mean 3.077 6.369
	Post	SAP	35	4	15.3249	14.7999	16.1	12.9999	9.97496				Post	SAP	35	4	6.2	0.0999487	0.599692		SD 5.345 6.914
	Post	SAP	35	4	32.6268	26.55	30.375	29.1999	29.6998		Means and SDs averaged across groups		Post	SAP	35	4	10.3	0.499714	0.0999429
	Post	SAP	37	4	43.3948	44.9913	42.7243	47.4641	51.1217		Measurement 1 2 3 4 5		Post	SAP	37	4	9.6	1.99891	4.49755		Group 4 Overall Mean: 2.740
	Post	SAP	38	4	29.2985	36.3789	33.8706	28.34	28.2481		Mean 44.119 44.955 44.231 45.286 49.982		Post	SAP	38	4	7.9	8.59533	0.0999457		Measurement 1 2
	Post	SAP	39	4	16.025	17.175	13.075	22.275	24.9999		SD 18.940 16.637 18.568 18.987 18.705		Post	SAP	39	4	5.2	0	12.5929		Mean 2.847 2.633
	Post	SAP	39	4	72.8379	72.5708	70.1739	72.9043	75.5947		--------------------------------------------------------------------		Post	SAP	39	4	10.1	5.19715	0.0999452		SD 3.189 3.465
	Post	SAP	41	4	29.3749	31.35	24.7	32.9999	35.1499				Post	SAP	41	4	8.2	8.89483	0.899477
	Post	SAP	41	4	30.425	39.11	31.0995	33.7999	35.3948		Analysis of Variance Summary Table		Post	SAP	41	4	9.5	6.19654	6.49637		Means and SDs averaged across groups
	Post	SAP	42	4	37.4777	40.8501	34.1499	40.4538	41.7				Post	SAP	42	4	17.7	4.39742	1.09936		Measurement 1 2
	Post	SAP	43	4	79.3746	72.4344	77.9565	81.0142	76.7791		Source SS df MS F		Post	SAP	43	4	11.1	0.699639	1.89902		Mean 3.256 4.722
	Post	SAP	44	4	24.6499	20.85	22.4749	27.55	31.8829		------------------------------------------------		Post	SAP	44	4	1.7	4.49738	2.89831		SD 4.745 5.279
											Between										--------------------------------
											------------------------------------------------
											pre v post B1 1280.779 1 1280.779 0.806										Analysis of Variance Summary Table
											ctl v sap B2 130.026 1 130.026 0.082
											interaction B3 847.767 1 847.767 0.533										Source SS df MS F
											Error 84222.461 53 1589.103										------------------------------------------------
											------------------------------------------------										Between
											Within										------------------------------------------------
											------------------------------------------------										pre v post B1 7.533 1 7.533 0.258
											linear W1 825.756 1 825.756 22.734										ctl v sap B2 81.251 1 81.251 2.785
											B1W1 67.660 1 67.660 1.863										interaction B3 2.416 1 2.416 0.083
											B2W1 16.234 1 16.234 0.447										ctl groups B4 1260.510 1 1260.510 43.212
											B3W1 0.115 1 0.115 0.003										sap groups B5 592.833 1 592.833 20.323
											Error 1925.059 53 36.322										Error 1546.037 53 29.171
											------------------------------------------------										------------------------------------------------
																					Within
																					------------------------------------------------
																					dev v ndeval W1 61.081 1 61.081 2.880
																					B1W1 0.151 1 0.151 0.007
																					B2W1 106.140 1 106.140 5.004
																					B3W1 0.924 1 0.924 0.044
																					B4W1 155.821 1 155.821 7.347
																					B5W1 3.267 1 3.267 0.154
																					Error 1124.140 53 21.210
																					------------------------------------------------
