# Supplementary material for: Inhibition of noradrenergic signalling in rodent orbitofrontal cortex impairs the updating of goal-directed actions
Source: eLife. 2023 Feb 20;12:e81623. doi: 10.7554/eLife.81623 (PMC9988255; doi:10.7554/eLife.81623)
Supplement: Figure 2—figure supplement 2—source data 1. — This excel file contains the raw data from the quantification of TH- and DβH-positive fibres in MO, M2, and insula cortex. [file elife-81623-fig2-figsupp2-data1.xlsx]

## Sheet: Figure 2-supplement figure 1
DBH immunostaining							==================================				======================================				==================================
	Group	Group label	MO	M2	Insula		PSY				PSY				PSY
	Ctl	1	4.26863	5.42366	4.80706		==================================				======================================				==================================
	Ctl	1	4.90808	4.75739	5.22745		Title: DBH immuno MO				Title: DBH immuno: Motor cortex (M2)				Title: DBH immuno: Insula
	Ctl	1	4.78065	4.56536	4.96392		Date: 22/09/2022 Time: 14:43:10				Date: 23/09/2022 Time: 12:55:41				Date: 23/09/2022 Time: 13:00:31
	Ctl	1	6.43588	6.22497	3.98706		----------------------------------				--------------------------------------				----------------------------------
	Ctl	1	3.98251	5.15464	6.11725
	Ctl	1	5.20235	4.39085	5.00706		Number of Groups: 3				Number of Groups: 3				Number of Groups: 3
	Ctl	1	4.36405	6.69712			Number of Measurements: 1				Number of Measurements: 1				Number of Measurements: 1
	Ctl	1	4.81812	5.66314
	6OHDA+Desi	2	4.9301	5.81477	5.61216		Number of subjects in...				Number of subjects in...				Number of subjects in...
	6OHDA+Desi	2	4.51157	5.85752	4.88902		Group 1: 8				Group 1: 8				Group 1: 6
	6OHDA+Desi	2	5.44667	3.53739	4.1949		Group 2: 8				Group 2: 10				Group 2: 9
	6OHDA+Desi	2	5.19735	6.40706	5.31412		Group 3: 12				Group 3: 12				Group 3: 11
	6OHDA+Desi	2	4.54598	6.57059	6.31725
	6OHDA+Desi	2	4.71438	5.71863	4.86745		Between contrast coefficients				Between contrast coefficients				Between contrast coefficients
	6OHDA+Desi	2	5.24954	7.92418	7.13412		Contrast Group...				Contrast Group...				Contrast Group...
	6OHDA+Desi	2		5.40549	3.91686		1 2 3				1 2 3				1 2 3
	6OHDA+Desi	2	4.72957	5.20771	6.20706		B1 1 1 -2				ctl/desi v 6 B1 1 1 -2				ctl/desi v 6 B1 1 1 -2
	6OHDA+Desi	2		6.50013			B2 1 -1 0				ctl v desi B2 1 -1 0				ctl v desi B2 1 -1 0
	6OHDA	3	1.76523	3.83974	5.71137
	6OHDA	3	3.73817	5.89203	4.11333		Means and Standard Deviations				Means and Standard Deviations				Means and Standard Deviations
	6OHDA	3	2.63471	4.59608	5.86745		Group 1 Overall Mean: 4.845				Group 1 Overall Mean: 5.359				Group 1 Overall Mean: 5.020
	6OHDA	3	3.16392	3.06444	3.57843		Measurement 1				Measurement 1				Measurement 1
	6OHDA	3	2.80353	1.7519	4.36314		Mean 4.845				Mean 5.359				Mean 5.020
	6OHDA	3	2.64196	4.07386	3.98039		SD 0.754				SD 0.810				SD 0.687
	6OHDA	3	1.43402	3.05516	4.23647
	6OHDA	3	3.00761	2.73098	4.2251		Group 2 Overall Mean: 4.916				Group 2 Overall Mean: 5.895				Group 2 Overall Mean: 5.383
	6OHDA	3	0.758824	3.10549	4.73176		Measurement 1				Measurement 1				Measurement 1
	6OHDA	3	1.20706	5.39176	5.95294		Mean 4.916				Mean 5.895				Mean 5.383
	6OHDA	3	2.62714	3.81124	5.21804		SD 0.348				SD 1.129				SD 1.045
	6OHDA	3	2.73569	4.23059
							Group 3 Overall Mean: 2.376				Group 3 Overall Mean: 3.795				Group 3 Overall Mean: 4.725
							Measurement 1				Measurement 1				Measurement 1
							Mean 2.376				Mean 3.795				Mean 4.725
							SD 0.886				SD 1.157				SD 0.830
							Means and SDs averaged across groups				Means and SDs averaged across groups				Means and SDs averaged across groups
							Measurement 1				Measurement 1				Measurement 1
							Mean 4.046				Mean 5.016				Mean 5.043
							SD 0.734				SD 1.068				SD 0.884
							--------------------				--------------------				--------------------
							Analysis of Variance Summary Table				Analysis of Variance Summary Table				Analysis of Variance Summary Table
							Source SS df MS F				Source SS df MS F				Source SS df MS F
							------------------------------------------------				------------------------------------------------				------------------------------------------------
							Between				Between				Between
							------------------------------------------------				------------------------------------------------				------------------------------------------------
							B1 42.989 1 42.989 79.887				ctl/desi v 6 B1 24.041 1 24.041 21.083				ctl/desi v 6 B1 1.414 1 1.414 1.808
							B2 0.020 1 0.020 0.037				ctl v desi B2 1.278 1 1.278 1.121				ctl v desi B2 0.475 1 0.475 0.608
							Error 13.453 25 0.538				Error 30.789 27 1.140				Error 17.988 23 0.782
							------------------------------------------------				------------------------------------------------				------------------------------------------------
