# Supplementary material for: Inhibition of noradrenergic signalling in rodent orbitofrontal cortex impairs the updating of goal-directed actions
Source: eLife. 2023 Feb 20;12:e81623. doi: 10.7554/eLife.81623 (PMC9988255; doi:10.7554/eLife.81623)
Supplement: Figure 2—source data 1. — This excel file contains the raw data from the quantification of TH- and DβH-positive fibres in the VO, LO, and A32. [file elife-81623-fig2-data1.xlsx]

## Sheet: Fig 2A-B
TH immunostaining							==================================	==================================
	Group	Group label	VO	LO	Area 32		PSY	PSY
	Ctl	1	1.65765	2.05425	6.34542		==================================	==================================
	Ctl	1	4.1681	4.09049	6.09513		Title: TH immuno OFC subregions	Title: TH immuno area 32
	Ctl	1	2.09549	1.96771	4.9895		Date: 18/07/2022 Time: 12:54:49	Date: 18/07/2022 Time: 12:58:36
	Ctl	1	2.75673	2.01049	5.07564		----------------------------------	----------------------------------
	Ctl	1	2.61922	1.78732	5.02007
	Ctl	1	1.99386	1.5252	5.20309		Number of Groups: 3	Number of Groups: 3
	Ctl	1	1.89039	2.58627	3.80603		Number of Measurements: 2	Number of Measurements: 1
	Ctl	1	1.54157	1.54105	3.60183
	6OHDA+Desi	2	1.04557	1.32596	4.06784		Number of subjects in...	Number of subjects in...
	6OHDA+Desi	2	1.78196	2.78725	3.73804		Group 1: 8	Group 1: 8
	6OHDA+Desi	2	0.760915	1.37203	4.7949		Group 2: 9	Group 2: 9
	6OHDA+Desi	2	1.01961	1.96667	5.28902		Group 3: 12	Group 3: 12
	6OHDA+Desi	2	1.02484	1.74954	3.71516
	6OHDA+Desi	2	1.22052	1.9417	4.81209		Between contrast coefficients	Between contrast coefficients
	6OHDA+Desi	2	0.53902	1.1048	5.96515		Contrast Group...	Contrast Group...
	6OHDA+Desi	2	1.02439	1.12745	5.46984		1 2 3	1 2 3
	6OHDA+Desi	2	0.506144	0.796471	4.3073		Ctl/Desi v 6 B1 1 1 -2	Ctl/Desi v 6 B1 1 1 -2
	6OHDA	3	0.701176	1.1011	3.93969		Ctl v Desi B2 1 -1 0	Ctl v Desi B2 1 -1 0
	6OHDA	3	0.430196	0.463399	4.54863		Ctl B3 1 0 0
	6OHDA	3	0.478431	0.433235	4.29574		Desi B4 0 1 0	Means and Standard Deviations
	6OHDA	3	0.221438	0.439869	4.78654		6OHDA B5 0 0 1	Group 1 Overall Mean: 5.017
	6OHDA	3	0.480196	1.15706	3.02369			Measurement 1
	6OHDA	3	0.239216	0.611569	3.16382		*** Caution ***	Mean 5.017
	6OHDA	3	0.638922	0.436569	4.20985		B3 coefficients do not sum to zero	SD 0.959
	6OHDA	3	0.599373	0.910275	2.92296		B4 coefficients do not sum to zero
	6OHDA	3	0.440863	0.375451	5.18933		B5 coefficients do not sum to zero	Group 2 Overall Mean: 4.684
	6OHDA	3	0.753627	0.45402	2.46142			Measurement 1
	6OHDA	3	0.164575	0.278118	2.32341		Within contrast coefficients	Mean 4.684
	6OHDA	3	0.200549	0.89302	2.89792		Contrast Measurement...	SD 0.791
							1 2
							VO v LO W1 1 -1	Group 3 Overall Mean: 3.647
								Measurement 1
							Means and Standard Deviations	Mean 3.647
							Group 1 Overall Mean: 2.268	SD 0.962
							Measurement 1 2
							Mean 2.340 2.195	Means and SDs averaged across groups
							SD 0.852 0.836	Measurement 1
								Mean 4.449
							Group 2 Overall Mean: 1.283	SD 0.912
							Measurement 1 2	--------------------
							Mean 0.992 1.575
							SD 0.384 0.604	Analysis of Variance Summary Table
							Group 3 Overall Mean: 0.538	Source SS df MS F
							Measurement 1 2	------------------------------------------------
							Mean 0.446 0.629	Between
							SD 0.203 0.303	------------------------------------------------
								Ctl/Desi v 6 B1 10.177 1 10.177 12.237
							Means and SDs averaged across groups	Ctl v Desi B2 0.469 1 0.469 0.564
							Measurement 1 2	Error 21.623 26 0.832
							Mean 1.259 1.466	------------------------------------------------
							SD 0.508 0.582
							--------------------------------
							Analysis of Variance Summary Table
							Source SS df MS F
							------------------------------------------------
							Between
							------------------------------------------------
							Ctl/Desi v 6 B1 21.528 1 21.528 41.143
							Ctl v Desi B2 8.212 1 8.212 15.695
							Ctl B3 82.283 1 82.283 157.256
							Desi B4 29.635 1 29.635 56.637
							6OHDA B5 6.935 1 6.935 13.254
							Error 13.604 26 0.523
							------------------------------------------------
							Within
							------------------------------------------------
							VO v LO W1 0.605 1 0.605 8.167
							B1W1 0.004 1 0.004 0.059
							B2W1 1.123 1 1.123 15.171
							B3W1 0.084 1 0.084 1.140
							B4W1 1.530 1 1.530 20.663
							B5W1 0.203 1 0.203 2.736
							Error 1.925 26 0.074
							------------------------------------------------

## Sheet: Fig 2C-D
DBH immunostaining							==================================	==================================
	Group	Group label	LO	VO	Area 32		PSY	PSY
	Ctl	1	4.83333	6.54196	4.91686		==================================	==================================
	Ctl	1	5.78569	5.71725	5.80716		Title: DBH immuno OFC subregions	Title: DBH immuno area 32
	Ctl	1	4.29196	5.36941	4.8875		Date: 18/07/2022 Time: 13:12:11	Date: 18/07/2022 Time: 13:14:26
	Ctl	1	4.89693	5.98641	5.46203		----------------------------------	----------------------------------
	Ctl	1	3.30235	3.68288	4.25614
	Ctl	1	5.61529	5.83137	5.06444		Number of Groups: 3	Number of Groups: 3
	Ctl	1	4.51231	4.93773	5.4031		Number of Measurements: 2	Number of Measurements: 1
	Ctl	1	5.29206	5.7851	4.66755
	6OHDA+Desi	2	4.29974	5.15516	5.35784		Number of subjects in...	Number of subjects in...
	6OHDA+Desi	2	4.31498	5.14055	4.95141		Group 1: 8	Group 1: 8
	6OHDA+Desi	2	3.04484	4.84595	4.91948		Group 2: 9	Group 2: 9
	6OHDA+Desi	2	4.69732	5.1817	5.09797		Group 3: 12	Group 3: 12
	6OHDA+Desi	2	4.29663	5.76612	4.94816
	6OHDA+Desi	2	4.46157	4.596	4.73094		Between contrast coefficients	Between contrast coefficients
	6OHDA+Desi	2	4.59945	5.96918	5.68329		Contrast Group...	Contrast Group...
	6OHDA+Desi	2	4.13696	5.67598	4.59608		1 2 3	1 2 3
	6OHDA+Desi	2	3.76137	4.50029	4.73667		Ctl/Desi v 6 B1 1 1 -2	Ctl/Desi v 6 B1 1 1 -2
	6OHDA+Desi	2					Ctl v Desi B2 1 -1 0	Ctl v Desi B2 1 -1 0
	6OHDA	3	0.238431	0.149255	1.88545
	6OHDA	3	0.206039	0.696314	3.30957		Within contrast coefficients	Means and Standard Deviations
	6OHDA	3	0.789608	1.72573	3.74926		Contrast Measurement...	Group 1 Overall Mean: 5.058
	6OHDA	3	0.136471	0.180523	3.29255		1 2	Measurement 1
	6OHDA	3	0.160706	0.295765	2.86604		LO v VO W1 1 -1	Mean 5.058
	6OHDA	3	0.513627	1.10657	2.87113		LO W2 1 0	SD 0.491
	6OHDA	3	0.153725	0.168235	3.24059		VO W3 0 1
	6OHDA	3	0.539477	1.11745	2.55938			Group 2 Overall Mean: 5.002
	6OHDA	3	0.246902	0.205647	1.89052		*** Caution ***	Measurement 1
	6OHDA	3	0.180588	0.162667	2.13635		W2 coefficients do not sum to zero	Mean 5.002
	6OHDA	3	0.190065	0.447712	2.25984		W3 coefficients do not sum to zero	SD 0.339
	6OHDA	3	0.390039	0.931242	3.15886
							Means and Standard Deviations	Group 3 Overall Mean: 2.768
							Group 1 Overall Mean: 5.149	Measurement 1
							Measurement 1 2	Mean 2.768
							Mean 4.816 5.481	SD 0.616
							SD 0.799 0.861
								Means and SDs averaged across groups
							Group 2 Overall Mean: 4.691	Measurement 1
							Measurement 1 2	Mean 4.276
							Mean 4.179 5.203	SD 0.511
							SD 0.504 0.515	--------------------
							Group 3 Overall Mean: 0.456	Analysis of Variance Summary Table
							Measurement 1 2
							Mean 0.312 0.599	Source SS df MS F
							SD 0.204 0.517	------------------------------------------------
								Between
							Means and SDs averaged across groups	------------------------------------------------
							Measurement 1 2	Ctl/Desi v 6 B1 35.938 1 35.938 137.682
							Mean 3.103 3.761	Ctl v Desi B2 0.013 1 0.013 0.051
							SD 0.518 0.628	Error 6.787 26 0.261
							--------------------------------	------------------------------------------------
							Analysis of Variance Summary Table
							Source SS df MS F
							------------------------------------------------
							Between
							------------------------------------------------
							Ctl/Desi v 6 B1 280.012 1 280.012 511.474
							Ctl v Desi B2 1.772 1 1.772 3.237
							Error 14.234 26 0.547
							------------------------------------------------
							Within
							------------------------------------------------
							LO v VO W1 6.113 1 6.113 53.251
							B1W1 1.093 1 1.093 9.522
							B2W1 0.273 1 0.273 2.377
							Error 2.985 26 0.115
							LO W2 271.189 1 271.189 1012.356
							B1W2 123.057 1 123.057 459.374
							B2W2 1.718 1 1.718 6.413
							Error 6.965 26 0.268
							VO W3 398.581 1 398.581 1010.642
							B1W3 158.048 1 158.048 400.747
							B2W3 0.327 1 0.327 0.830
							Error 10.254 26 0.394
							------------------------------------------------
