# Supplementary material for: Inhibition of noradrenergic signalling in rodent orbitofrontal cortex impairs the updating of goal-directed actions
Source: eLife. 2023 Feb 20;12:e81623. doi: 10.7554/eLife.81623 (PMC9988255; doi:10.7554/eLife.81623)
Supplement: Figure 3—figure supplement 1—source data 1. — This excel file contains the behavioural data from the initial training, outcome devaluation test, and the consumption tests (initial and reversal) for rats injected with 6-OHDA and their respective controls. [file elife-81623-fig3-figsupp1-data1.xlsx]

## Sheet: Panel A
Initial training			Training session													======================================
Group	Rat #	Group label	1	2	3	4	5	6	7	8	9	10	11	12		PSY
Ctl	1	1	3.49132	6.49378	4.15137	13.2748	13.3599	20.122	22.6359	23.2842	32.0793	31.1986	32.3206	34.75		======================================
Ctl	2	1	0.05	0.15	2.93059	16.1287	22.7545	19.897	30.5192	24.4807	44.2766	31	34.7234	49.129		Title: Expt 2: 6OHDA initial trainng
Ctl	3	1	1.46674	1.05696	3.11679	14.59	14.2412	27.4044	19.2131	13.4279	29.1688	24.45	28.425	39.936		Date: 3/10/2022 Time: 4:22:34 PM
Ctl	4	1	0.075	0.175	0.899147	3.025	6.44028	11.0413	14.375	8.875	19.1889	11.9	5.99878	10.6		--------------------------------------
Ctl	5	1	2.48699	2.08367	2.41798	7.97275	10.4285	19.8008	24.9415	27.1309	34.2356	35.6099	37.9891	50.8187
Ctl	6	1	2.57717	6.49483	7.7252	11.9486	6.17311	16.4807	22.1228	25.8684	33.7585	35.775	36.5191	31.375		Number of Groups: 2
Ctl	7	1	0.125	3.8676	2.72815	14.5584	23.8419	13.937	17.7843	8.8962	26.3349	26.8	34.1099	32.477		Number of Measurements: 12
Ctl	8	1	0.637505	2.85665	11.5432	16.3037	13.777	29.9956	22.9385	16.3003	26.7181	24.0918	34.0843	36.2496
6OHDA	3	2	7.11119	10.7416	11.962	22.2809	27.6881	30.8106	42.4746	44.6359	45.4198	45.9238	52.5623	45.3761		Number of subjects in...
6OHDA	6	2	2.06326	5.78114	7.04625	16.3451	27.3416	26.2612	33.4091	37.4209	41.4268	47.4408	44.412	48.3952		Group 1: 8
6OHDA	8	2	2.22521	7.98817	10.631	21.3169	25.0438	30.441	27.5886	29.5769	35.9561	23.225	24.9753	29.4611		Group 2: 12
6OHDA	9	2	2.38099	8.09822	7.64822	16.4447	25.3367	33.4434	39.805	50.8762	49.4628	56.9015	58.7613	62.2974
6OHDA	11	2	4.03315	11.3115	15.0502	20.3817	31.8303	38.0543	41.2801	42.0523	48.9262	52.0218	50.9378	50.9141		Between contrast coefficients
6OHDA	16	2	0	2.91961	9.45682	24.8547	31.7899	31.0853	30.3953	26.4695	29.5817	34.969	39.5646	41.3726		Contrast Group...
6OHDA	18	2	3.77289	9.30021	8.9727	14.0179	29.3543	35.1726	43.897	57.7043	70.4679	68.1776	74.2345	67.9979		1 2
6OHDA	21	2	7.00559	12.8731	14.7778	29.3763	35.6032	39.1894	45.6527	49.9163	50.7373	51.1196	50.2633	54.5291		ctl v 6OHDA B1 1 -1
6OHDA	23	2	6.81211	10.5261	10.6203	24.1586	32.3978	39.5921	38.8598	40.2737	52.5628	56.9009	67.8863	74.7178		ctl B2 1 0
6OHDA	26	2	1.67922	2.79274	6.36141	22.1461	21.4091	38.1693	45.4028	50.9959	55.231	57.8615	54.9512	41.7761		6OHDA B3 0 1
6OHDA	29	2	5.91191	9.72626	9.53304	21.5462	25.2533	29.8351	34.7614	39.5615	42.1434	42.5432	39.6212	46.4014
6OHDA	31	2	6.58702	9.52647	12.9373	26.4971	30.7801	33.6984	49.1168	59.5768	68.563	57.0069	64.1773	67.7834		*** Caution ***
																B2 coefficients do not sum to zero
																B3 coefficients do not sum to zero
																Within contrast coefficients
																Contrast Measurement...
																1 2 3 4 5 6 7 8 9 10 11 12
																linear W1 -11 -9 -7 -5 -3 -1 1 3 5 7 9 11
																Means and Standard Deviations
																Group 1 Overall Mean: 18.292
																Measurement 1 2 3 4 5 6 7 8 9 10 11 12
																Mean 1.366 2.898 4.440 12.225 13.876 19.835 21.816 18.534 30.721 27.604 30.521 35.669
																SD 1.347 2.556 3.482 4.578 6.601 6.370 4.869 7.584 7.348 7.792 10.308 12.462
																Group 2 Overall Mean: 32.811
																Measurement 1 2 3 4 5 6 7 8 9 10 11 12
																Mean 4.132 8.466 10.417 21.615 28.652 33.813 39.387 44.089 49.207 49.508 51.862 52.586
																SD 2.481 3.175 2.838 4.428 4.022 4.284 6.613 10.261 11.917 11.911 13.649 13.295
																Means and SDs averaged across groups
																Measurement 1 2 3 4 5 6 7 8 9 10 11 12
																Mean 2.749 5.682 7.428 16.920 21.264 26.824 30.601 31.311 39.964 38.556 41.191 44.127
																SD 2.114 2.950 3.104 4.487 5.180 5.195 5.995 9.312 10.382 10.502 12.457 12.978
																--------------------------------------------------------------------------------------------------------------------------------------------------------
																Analysis of Variance Summary Table
																Source SS df MS F
																------------------------------------------------
																Between
																------------------------------------------------
																ctl v 6OHDA B1 12141.856 1 12141.856 35.332
																ctl B2 32121.630 1 32121.630 93.471
																6OHDA B3 155023.969 1 155023.969 451.106
																Error 6185.759 18 343.653
																------------------------------------------------
																Within
																------------------------------------------------
																linear W1 43759.333 1 43759.333 190.660
																B1W1 2019.076 1 2019.076 8.797
																B2W1 11241.295 1 11241.295 48.978
																B3W1 40361.070 1 40361.070 175.853
																Error 4131.276 18 229.515
																------------------------------------------------

## Sheet: Panel B
Initial test						===================================
Group	Rat #	Group label	Dev (lever)	Ndev (lever)		PSY
Ctl	1	1	0.2	0.5		===================================
Ctl	2	1	0	6.4		Title: Expt 2: 6OHDA initial test
Ctl	3	1	0	3.7		Date: 3/10/2022 Time: 4:27:22 PM
Ctl	4	1	0.2	0.1		-----------------------------------
Ctl	5	1	4.6	22.6
Ctl	6	1	3.9	9		Number of Groups: 2
Ctl	7	1	3.4	9.3		Number of Measurements: 2
Ctl	8	1	0.1	12.7
6OHDA	3	2	1.9	13.5		Number of subjects in...
6OHDA	6	2	7	17		Group 1: 8
6OHDA	8	2	1.6	12.7		Group 2: 12
6OHDA	9	2	2.6	8.6
6OHDA	11	2	5	15.4		Between contrast coefficients
6OHDA	16	2	0.3	7.2		Contrast Group...
6OHDA	18	2	4.1	18.7		1 2
6OHDA	21	2	2.7	9.9		ctl v 6OHDA B1 1 -1
6OHDA	23	2	0.8	11.7
6OHDA	26	2	8.8	7.3		Within contrast coefficients
6OHDA	29	2	0.1	4.9		Contrast Measurement...
6OHDA	31	2	7.4	12		1 2
						dev v ndev W1 1 -1
						Means and Standard Deviations
						Group 1 Overall Mean: 4.794
						Measurement 1 2
						Mean 1.550 8.038
						SD 2.028 7.345
						Group 2 Overall Mean: 7.550
						Measurement 1 2
						Mean 3.525 11.575
						SD 2.937 4.195
						Means and SDs averaged across groups
						Measurement 1 2
						Mean 2.538 9.806
						SD 2.621 5.634
						--------------------------------
						Analysis of Variance Summary Table
						Source SS df MS F
						------------------------------------------------
						Between
						------------------------------------------------
						ctl v 6OHDA B1 72.930 1 72.930 2.835
						Error 463.024 18 25.724
						------------------------------------------------
						Within
						------------------------------------------------
						dev v ndev W1 507.213 1 507.213 39.370
						B1W1 5.859 1 5.859 0.455
						Error 231.899 18 12.883
						------------------------------------------------

## Sheet: Panel C-D
Consumption tests			Initial test		Reversal test			===============================================				================================================
Group	Rat #	Group label	Dev (Consump)	Ndev (Consump)	Dev (Consump)	Ndev (Consump)		PSY				PSY
Ctl	1	1	0	1.3	0.5	2.3		===============================================				================================================
Ctl	2	1	0	0.95	0	0.9		Title: Expt 2: 6OHDA initial consumption test				Title: Expt 2: 6OHDA reversal consumption test
Ctl	3	1	0	0.05	0	1.8		Date: 3/10/2022 Time: 4:36:57 PM				Date: 3/10/2022 Time: 4:35:18 PM
Ctl	4	1	0	0.05	0	1.9		-----------------------------------------------				------------------------------------------------
Ctl	5	1	0	2.3	0	2.3
Ctl	6	1	0	1.95	0	2		Number of Groups: 2				Number of Groups: 2
Ctl	7	1	0	0.3	0	0.7		Number of Measurements: 2				Number of Measurements: 2
Ctl	8	1	0	1.3	0	3.1
6OHDA	3	2	0	4.9	0	4.5		Number of subjects in...				Number of subjects in...
6OHDA	6	2	0.25	1.8	0	4.8		Group 1: 8				Group 1: 8
6OHDA	8	2	0.05	5	2.1	6.7		Group 2: 12				Group 2: 12
6OHDA	9	2	0.25	2.35	0	5.4
6OHDA	11	2	0	2.65	0.7	6.2		Between contrast coefficients				Between contrast coefficients
6OHDA	16	2	0	2.35	0	2.3		Contrast Group...				Contrast Group...
6OHDA	18	2	0	2.9	0	3.3		1 2				1 2
6OHDA	21	2	0	1.05	0	3.1		ctl v 6OHDA B1 1 -1				ctl v 6OHDA B1 1 -1
6OHDA	23	2	2.95	1.1	0	2.8						ctl B2 1 0
6OHDA	26	2	0	0.4	0	2.1		Within contrast coefficients				6OHDA B3 0 1
6OHDA	29	2	0	1.6	0	2.9		Contrast Measurement...
6OHDA	31	2	0	5.1	0	7.4		1 2				*** Caution ***
								dev v ndev W1 1 -1				B2 coefficients do not sum to zero
												B3 coefficients do not sum to zero
								Means and Standard Deviations
								Group 1 Overall Mean: 0.513				Within contrast coefficients
								Measurement 1 2				Contrast Measurement...
								Mean 0.000 1.025				1 2
								SD 0.000 0.851				dev v ndev W1 1 -1
								Group 2 Overall Mean: 1.446				Means and Standard Deviations
								Measurement 1 2				Group 1 Overall Mean: 0.969
								Mean 0.292 2.600				Measurement 1 2
								SD 0.843 1.614				Mean 0.063 1.875
												SD 0.177 0.776
								Means and SDs averaged across groups
								Measurement 1 2				Group 2 Overall Mean: 2.263
								Mean 0.146 1.813				Measurement 1 2
								SD 0.659 1.369				Mean 0.233 4.292
								--------------------------------				SD 0.621 1.808
								Analysis of Variance Summary Table				Means and SDs averaged across groups
												Measurement 1 2
								Source SS df MS F				Mean 0.148 3.083
								------------------------------------------------				SD 0.498 1.494
								Between				--------------------------------
								------------------------------------------------
								ctl v 6OHDA B1 8.363 1 8.363 9.295				Analysis of Variance Summary Table
								Error 16.195 18 0.900
								------------------------------------------------				Source SS df MS F
								Within				------------------------------------------------
								------------------------------------------------				Between
								dev v ndev W1 26.667 1 26.667 18.950				------------------------------------------------
								B1W1 3.953 1 3.953 2.809				ctl v 6OHDA B1 16.068 1 16.068 9.997
								Error 25.330 18 1.407				ctl B2 15.016 1 15.016 9.342
								------------------------------------------------				6OHDA B3 122.854 1 122.854 76.437
												Error 28.931 18 1.607
												------------------------------------------------
												Within
												------------------------------------------------
												dev v ndev W1 82.720 1 82.720 94.724
												B1W1 12.105 1 12.105 13.862
												B2W1 13.141 1 13.141 15.048
												B3W1 98.820 1 98.820 113.161
												Error 15.719 18 0.873
												------------------------------------------------
