# Supplementary material for: Inhibition of noradrenergic signalling in rodent orbitofrontal cortex impairs the updating of goal-directed actions
Source: eLife. 2023 Feb 20;12:e81623. doi: 10.7554/eLife.81623 (PMC9988255; doi:10.7554/eLife.81623)
Supplement: Figure 3—figure supplement 2—source data 1. — This excel file contains the behavioural data from the initial training, outcome devaluation test, and the consumption tests (initial and reversal) for rats injected with 6-OHDA+desipramine and their respective controls. [file elife-81623-fig3-figsupp2-data1.xlsx]

## Sheet: Panel A
Initial training			Training session													============================================
Group	Rat #	Group label	1	2	3	4	5	6	7	8	9	10	11	12		PSY
Ctrl	1	1	3.80825	7.64364	6.41399	27.9812	33.9131	37.1797	41.3119	44.5246	49.4296	50.6289	53.5631	58.1896		============================================
Ctrl	5	1	3.22764	8.11723	8.2784	19.406	31.7784	35.7696	44.2291	47.6052	60.1242	47.0506	55.5875	59.4826		Title: Expt 3: 6OHDA+Desi initial training
Ctrl	10	1	5.96611	8.89	11.2777	21.3711	28.1545	28.5165	21.2378	36.2333	54.4534	59.101	72.4521	69.6763		Date: 3/10/2022 Time: 4:58:15 PM
Ctrl	14	1	3.77719	5.88286	6.6286	14.7963	19.4672	22.5745	23.6068	28.4647	35.7448	41.1116	48.9236	58.6193		--------------------------------------------
Ctrl	19	1	1.94648	4.7706	6.12454	16.6332	17.4769	26.4796	28.2856	28.785	17.0049	26.025	42.952	57.9524
Ctrl	24	1	4.29421	10.9828	8.10012	19.051	26.0623	32.739	31.5499	25.6326	31.9453	24.6448	23.6509	21.175		Number of Groups: 2
Ctrl	4	1	4.77366	8.94385	11.4802	22.6943	28.8218	31.957	37.603	47.8054	50.5578	47.1478	51.18	49.4614		Number of Measurements: 12
Ctrl	32	1	3.96479	12.0413	14.7234	24.9579	33.2523	27.2088	40.4341	47.5297	51.7021	50.895	53.8919	55.1776
6OHDA + Desi	28	2	3.35304	5.64604	7.36047	22.5072	31.8732	31.3581	32.9966	50.3889	65.2603	59.3587	58.7127	58.7078		Number of subjects in...
6OHDA + Desi	7	2	0	0.05	7.17579	19.5715	18.3085	25.4837	33.1753	44.8509	42.5637	43.9574	49.1052	50.3421		Group 1: 8
6OHDA + Desi	13	2	5.91633	9.42058	6.7739	20.537	25.8998	29.752	28.171	34.0937	38.06	33.5793	37.175	41.4015		Group 2: 9
6OHDA + Desi	15	2	4.18439	6.73949	13.6506	22.513	24.5007	29.4657	35.3615	37.8378	41.2586	33.75	43.7602	43.8901
6OHDA + Desi	17	2	0.720498	7.70933	9.62105	16.6762	34.4102	41.0816	39.2267	49.0793	60.7923	59.4213	73.7349	69.9534		Between contrast coefficients
6OHDA + Desi	20	2	2.35948	4.3591	7.89512	15.1925	8.30726	26.0403	27.5522	26.0859	31.3841	34.1445	34.754	35.5473		Contrast Group...
6OHDA + Desi	22	2	6.49439	10.2772	12.0386	25.2879	38.2881	42.3212	45.3926	54.5402	64.6395	65.6942	63.2338	64.2381		1 2
6OHDA + Desi	27	2	3.12626	10.2672	9.4992	20.0519	28.4836	27.2978	32.4296	43.0565	48.3459	54.2119	54.6594	45.8684		ctl v desi B1 1 -1
6OHDA + Desi	30	2	1.61985	5.60591	10.6699	19.6016	24.419	10.0047	24.4507	41.566	58.0899	48.9537	43.5656	64.1039
																Within contrast coefficients
																Contrast Measurement...
																1 2 3 4 5 6 7 8 9 10 11 12
																linear W1 -11 -9 -7 -5 -3 -1 1 3 5 7 9 11
																Means and Standard Deviations
																Group 1 Overall Mean: 30.256
																Measurement 1 2 3 4 5 6 7 8 9 10 11 12
																Mean 3.970 8.408 9.128 20.861 27.365 30.304 33.533 38.321 43.869 43.325 50.274 53.716
																SD 1.161 2.409 3.068 4.328 6.111 4.972 8.619 9.660 14.358 12.198 13.675 14.291
																Group 2 Overall Mean: 31.002
																Measurement 1 2 3 4 5 6 7 8 9 10 11 12
																Mean 3.086 6.677 9.410 20.216 26.054 29.200 33.196 42.390 50.043 48.118 50.966 52.672
																SD 2.199 3.278 2.371 3.061 8.939 9.450 6.364 8.795 12.514 12.405 12.775 11.982
																Means and SDs averaged across groups
																Measurement 1 2 3 4 5 6 7 8 9 10 11 12
																Mean 3.528 7.542 9.269 20.538 26.710 29.752 33.364 40.356 46.956 45.721 50.620 53.194
																SD 1.791 2.905 2.718 3.706 7.749 7.692 7.501 9.209 13.406 12.309 13.203 13.110
																--------------------------------------------------------------------------------------------------------------------------------------------------------
																Analysis of Variance Summary Table
																Source SS df MS F
																------------------------------------------------
																Between
																------------------------------------------------
																ctl v desi B1 28.298 1 28.298 0.063
																Error 6707.996 15 447.200
																------------------------------------------------
																Within
																------------------------------------------------
																linear W1 55251.548 1 55251.548 220.445
																B1W1 77.984 1 77.984 0.311
																Error 3759.549 15 250.637
																------------------------------------------------

## Sheet: Panel B
Initial test						========================================
Group	Rat #	Group label	Dev (lever)	Ndev (lever)		PSY
Ctrl	1	1	0.5	4		========================================
Ctrl	4	1	9.1	22.1		Title: Expt 3: 6OHDA+Desi initial test
Ctrl	5	1	5.3	7.4		Date: 3/10/2022 Time: 5:00:58 PM
Ctrl	10	1	4.8	10.6		----------------------------------------
Ctrl	14	1	4.4	16.7
Ctrl	19	1	2.6	16.8		Number of Groups: 2
Ctrl	24	1	0.8	2.2		Number of Measurements: 2
Ctrl	32	1	3.3	7.5
6OHDA + Desi	7	2	0.3	9.7		Number of subjects in...
6OHDA + Desi	13	2	0.7	17.5		Group 1: 8
6OHDA + Desi	15	2	5.7	6.6		Group 2: 9
6OHDA + Desi	17	2	3.6	11.9
6OHDA + Desi	20	2	0.7	13.9		Between contrast coefficients
6OHDA + Desi	22	2	3.6	26.5		Contrast Group...
6OHDA + Desi	27	2	4.3	15.7		1 2
6OHDA + Desi	28	2	0.2	12.1		ctl v desi B1 1 -1
6OHDA + Desi	30	2	0.3	8.6
						Within contrast coefficients
						Contrast Measurement...
						1 2
						dev v ndev W1 1 -1
						Means and Standard Deviations
						Group 1 Overall Mean: 7.381
						Measurement 1 2
						Mean 3.850 10.913
						SD 2.758 6.980
						Group 2 Overall Mean: 7.883
						Measurement 1 2
						Mean 2.156 13.611
						SD 2.130 5.921
						Means and SDs averaged across groups
						Measurement 1 2
						Mean 3.003 12.262
						SD 2.443 6.437
						--------------------------------
						Analysis of Variance Summary Table
						Source SS df MS F
						------------------------------------------------
						Between
						------------------------------------------------
						ctl v desi B1 2.135 1 2.135 0.069
						Error 465.529 15 31.035
						------------------------------------------------
						Within
						------------------------------------------------
						dev v ndev W1 726.180 1 726.180 44.357
						B1W1 40.868 1 40.868 2.496
						Error 245.570 15 16.371
						------------------------------------------------

## Sheet: Panel C-D
Consumption tests			Initial test		Reversal test			====================================================					=====================================================
Group	Rat #	Group label	Dev (Consump)	Ndev (Consump)	Dev (Consump)	Ndev (Consump)		PSY					PSY
Ctrl	1	1	0	1.7	0.6	4.6		====================================================					=====================================================
Ctrl	4	1	0	3.6	0	4.2		Title: Expt 3: 6OHDA+Desi initial consumption test					Title: Expt 3: 6OHDA+Desi reversal consumption test
Ctrl	5	1	0	0.4	0	4.9		Date: 3/10/2022 Time: 5:04:07 PM					Date: 3/10/2022 Time: 5:06:44 PM
Ctrl	10	1	0.05	3.4	0	6.5		----------------------------------------------------					-----------------------------------------------------
Ctrl	14	1	0.15	2.3	0.1	4.3
Ctrl	19	1	0	1.7	0	5.2		Number of Groups: 2					Number of Groups: 2
Ctrl	24	1	0.05	1.15	0	4.6		Number of Measurements: 2					Number of Measurements: 2
Ctrl	32	1	0.05	2.7	0	5.5
6OHDA+Desi	7	2	0	1.65	0.1	4.2		Number of subjects in...					Number of subjects in...
6OHDA+Desi	13	2	0	2.35	0	2.6		Group 1: 8					Group 1: 8
6OHDA+Desi	15	2	0	0.3	0.4	3.8		Group 2: 9					Group 2: 9
6OHDA+Desi	17	2	0.2	3.8	0.2	3.2
6OHDA+Desi	20	2	0	0.9	0	3.6		Between contrast coefficients					Between contrast coefficients
6OHDA+Desi	22	2	0	3.95	0	4.8		Contrast Group...					Contrast Group...
6OHDA+Desi	27	2	0	1.2	0	4.7		1 2					1 2
6OHDA+Desi	28	2	0	0.45	0	4.4		ctl v desi B1 1 -1					B1 1 -1
6OHDA+Desi	30	2	0	2.05	0	5							Ctl B2 1 0
								Within contrast coefficients					6OHDA+Desi B3 0 1
								Contrast Measurement...
								1 2					*** Caution ***
		1	0.6	4.6				dev v ndev W1 1 -1					B2 coefficients do not sum to zero
		1	0	4.2									B3 coefficients do not sum to zero
		1	0	4.9				Means and Standard Deviations
		1	0	6.5				Group 1 Overall Mean: 1.069					Within contrast coefficients
		1	0.1	4.3				Measurement 1 2					Contrast Measurement...
		1	0	5.2				Mean 0.013 2.125					1 2
		1	0	4.6				SD 0.035 1.093					W1 1 -1
		1	0	5.5
		2	0.1	4.2				Group 2 Overall Mean: 0.950					Means and Standard Deviations
		2	0	2.6				Measurement 1 2					Group 1 Overall Mean: 2.531
		2	0.4	3.8				Mean 0.022 1.878					Measurement 1 2
		2	0.2	3.2				SD 0.067 1.340					Mean 0.088 4.975
		2	0	3.6									SD 0.210 0.755
		2	0	4.8				Means and SDs averaged across groups
		2	0	4.7				Measurement 1 2					Group 2 Overall Mean: 2.056
		2	0	4.4				Mean 0.017 2.001					Measurement 1 2
		2	0	5				SD 0.054 1.230					Mean 0.078 4.033
								--------------------------------					SD 0.139 0.800
								Analysis of Variance Summary Table					Means and SDs averaged across groups
													Measurement 1 2
								Source SS df MS F					Mean 0.083 4.504
								------------------------------------------------					SD 0.176 0.780
								Between					--------------------------------
								------------------------------------------------
								ctl v desi B1 0.119 1 0.119 0.152					Analysis of Variance Summary Table
								Error 11.779 15 0.785
								------------------------------------------------					Source SS df MS F
								Within					------------------------------------------------
								------------------------------------------------					Between
								dev v ndev W1 33.343 1 33.343 45.570					------------------------------------------------
								B1W1 0.140 1 0.140 0.191					B1 1.917 1 1.917 6.759
								Error 10.975 15 0.732					Ctl B2 102.516 1 102.516 361.495
								------------------------------------------------					6OHDA+Desi B3 76.056 1 76.056 268.190
													Error 4.254 15 0.284
													------------------------------------------------
													Within
													------------------------------------------------
													W1 165.599 1 165.599 466.434
													B1W1 1.839 1 1.839 5.180
													B2W1 95.551 1 95.551 269.132
													B3W1 70.409 1 70.409 198.317
													Error 5.325 15 0.355
													------------------------------------------------
