# Supplementary material for: Inhibition of noradrenergic signalling in rodent orbitofrontal cortex impairs the updating of goal-directed actions
Source: eLife. 2023 Feb 20;12:e81623. doi: 10.7554/eLife.81623 (PMC9988255; doi:10.7554/eLife.81623)
Supplement: Figure 3—source data 1. — This excel file contains the behavioural data from the reversal training and outcome devaluation test for rats injected with 6-OHDA or 6-OHDA+desipramine and their respective controls. [file elife-81623-fig3-data1.xlsx]

## Sheet: Fig 3B-C
Reversal training			Training session						======================================	Reversal test								==================================
Group	Rat #	Group label	1	2	3	4	5		PSY		Group	Rat #	Group label	Consump (Dev)	Dev (lever)	Ndev (lever)		PSY
Ctl	1	1	29.8648	35.9722	32.6317	40.4394	44.1647		======================================		Ctl	1	1	5.65	0	0		==================================
Ctl	2	1	32.9648	24.293	25.6	30.1615	33.419		Title: Reversal training ctl v 6OHDA		Ctl	2	1	4.75	1.1	15.6		Title: Reversal test ctl v 6OHDA
Ctl	3	1	34.8534	35.729	29.7112	51.1792	44.283		Date: 18/07/2022 Time: 13:42:51		Ctl	3	1	3.05	5.8	39.3		Date: 18/07/2022 Time: 13:48:33
Ctl	4	1	7.325	6.875	7.125	7.65	10.375		--------------------------------------		Ctl	4	1	4.55	0.1	0		----------------------------------
Ctl	5	1	36.1061	35.246	44.6582	53.5829	54.6127				Ctl	5	1	6.6	3	6.2
Ctl	6	1	27.675	27.1	31.025	35.6271	35.25		Number of Groups: 2		Ctl	6	1	6.25	2.8	14.8		Number of Groups: 2
Ctl	7	1	31.9242	5.55	40.8602	22.1117	22.65		Number of Measurements: 5		Ctl	7	1	1.6	6.4	9.4		Number of Measurements: 2
Ctl	8	1	32.9276	34.5758	38.0313	38.4304	33.3546				Ctl	8	1	4.6	0.1	6.6
6OHDA	3	2	29.2371	33.6101	39.1928	50.8639	26.3986		Number of subjects in...		6OHDA	3	2	4.85	5.7	4.1		Number of subjects in...
6OHDA	6	2	42.0477	51.66	49.3577	63.7043	64.4276		Group 1: 8		6OHDA	6	2	6.8	7.8	7.8		Group 1: 8
6OHDA	8	2	21.4	28.2127	27.675	32.625	21.875		Group 2: 12		6OHDA	8	2	8.8	4.9	0.2		Group 2: 12
6OHDA	9	2	59.9533	75.3293	87.5296	94.2956	95.4519				6OHDA	9	2	5.9	11.5	6.7
6OHDA	11	2	47.6712	46.4036	47.5236	65.5192	61.4199		Between contrast coefficients		6OHDA	11	2	5.95	4.5	11.8		Between contrast coefficients
6OHDA	16	2	47.9891	43.8915	48.0106	60.3174	55.4868		Contrast Group...		6OHDA	16	2	2.15	7.1	18.3		Contrast Group...
6OHDA	18	2	56.8064	60.398	73.8671	79.0837	81.6047		1 2		6OHDA	18	2	5.15	8.6	6.4		1 2
6OHDA	21	2	55.3314	52.5945	59.9032	67.6043	69.2118		B1 1 -1		6OHDA	21	2	6.9	0.8	7.1		ctl v 6OHDA B1 1 -1
6OHDA	23	2	72.2094	73.3267	76.867	90.4887	88.9652		B2 1 0		6OHDA	23	2	3.45	5.7	4.8		ctl B2 1 0
6OHDA	26	2	36.6449	55.9934	52.4747	64.7061	68.4003		B3 0 1		6OHDA	26	2	7.2	8.4	11.5		6OHDA B3 0 1
6OHDA	29	2	35.3399	41.8822	47.2558	51.1834	56.3667				6OHDA	29	2	5.15	5.9	6.8
6OHDA	31	2	58.7016	72.3603	76.2659	77.2729	79.564		*** Caution ***		6OHDA	31	2	5.4	2.3	9.3		*** Caution ***
									B2 coefficients do not sum to zero									B2 coefficients do not sum to zero
									B3 coefficients do not sum to zero									B3 coefficients do not sum to zero
									Within contrast coefficients									Within contrast coefficients
									Contrast Measurement...									Contrast Measurement...
									1 2 3 4 5									1 2
									W1 -2 -1 0 1 2									deval v ndev W1 1 -1
									Means and Standard Deviations									Means and Standard Deviations
									Group 1 Overall Mean: 31.155									Group 1 Overall Mean: 6.950
									Measurement 1 2 3 4 5									Measurement 1 2
									Mean 29.213 25.675 31.200 34.900 34.788									Mean 2.413 11.488
									SD 9.242 12.744 11.582 15.043 13.714									SD 2.567 12.658
									Group 2 Overall Mean: 57.533									Group 2 Overall Mean: 7.000
									Measurement 1 2 3 4 5									Measurement 1 2
									Mean 46.933 52.975 57.175 66.475 64.108									Mean 6.100 7.900
									SD 14.615 15.351 17.866 17.327 22.441									SD 2.884 4.545
									Means and SDs averaged across groups									Means and SDs averaged across groups
									Measurement 1 2 3 4 5									Measurement 1 2
									Mean 38.073 39.325 44.188 50.688 49.448									Mean 4.256 9.694
									SD 12.796 14.394 15.723 16.477 19.517									SD 2.765 8.656
									--------------------------------------------------------------------									--------------------------------
									Analysis of Variance Summary Table									Analysis of Variance Summary Table
									Source SS df MS F									Source SS df MS F
									------------------------------------------------									------------------------------------------------
									Between									Between
									------------------------------------------------									------------------------------------------------
									B1 16699.595 1 16699.595 14.736									ctl v 6OHDA B1 0.024 1 0.024 0.000
									B2 38825.361 1 38825.361 34.261									ctl B2 772.840 1 772.840 15.447
									B3 198605.067 1 198605.067 175.256									6OHDA B3 1176.000 1 1176.000 23.505
									Error 20398.120 18 1133.229									Error 900.590 18 50.033
									------------------------------------------------									------------------------------------------------
									Within									Within
									------------------------------------------------									------------------------------------------------
									W1 2234.232 1 2234.232 44.692									deval v ndev W1 283.838 1 283.838 8.723
									B1W1 362.340 1 362.340 7.248									B1W1 127.022 1 127.022 3.903
									B2W1 332.113 1 332.113 6.643									B2W1 329.423 1 329.423 10.123
									B3W1 2747.547 1 2747.547 54.960									B3W1 19.440 1 19.440 0.597
									Error 899.859 18 49.992									Error 585.728 18 32.540
									------------------------------------------------									------------------------------------------------

## Sheet: Fig 3D-E
Reversal training			Training session						=====================================	Reversal test								==================================
Group	Rat #	Group label	1	2	3	4	5		PSY		Group	Rat #	Group label	Consump (Dev)	Dev (lever)	Ndev (lever)		PSY
Ctl	1	1	55.8974	63.9224	64.4721	73.688	76.6735		=====================================		Ctl	1	1	6.1	5.7	2.1		==================================
Ctl	4	1	47.832	57.5014	51.1815	73.1848	73.8039		Title: Reversal training ctl v desi		Ctl	4	1	5.75	14.8	25.3		Title: Reversal test ctl v desi
Ctl	5	1	66.1779	63.624	54.1029	76.2225	80.6002		Date: 18/07/2022 Time: 14:32:34		Ctl	5	1	3.95	2	24.5		Date: 18/07/2022 Time: 14:39:55
Ctl	10	1	62.664	59.8503	56.8826	69.2791	46.3117		-------------------------------------		Ctl	10	1	7.1	0.8	0.9		----------------------------------
Ctl	14	1	43.3309	50.7538	48.5267	55.6885	60.2903				Ctl	14	1	4.9	8	3.9
Ctl	19	1	58.8054	59.6515	57.9241	65.2948	64.7235		Number of Groups: 2		Ctl	19	1	0.25	10.4	10.3		Number of Groups: 2
Ctl	24	1	53.1048	56.5797	58.6366	61.0001	63.6236		Number of Measurements: 5		Ctl	24	1	6.1	10.9	7.5		Number of Measurements: 2
Ctl	32	1	65.8783	75.8981	64.6759	73.002	68.6806				Ctl	32	1	5.65	3.3	10.5
6OHDA+Desi	7	2	55.0684	64.885	68.1297	66.8751	66.2619		Number of subjects in...		6OHDA+Desi	7	2	8.55	8	3.8		Number of subjects in...
6OHDA+Desi	13	2	30.0466	35.9041	34.6564	43.5015	44.2102		Group 1: 8		6OHDA+Desi	13	2	4.4	2.8	7.8		Group 1: 8
6OHDA+Desi	15	2	40.339	47.2974	46.8106	52.4641	51.4528		Group 2: 9		6OHDA+Desi	15	2	3.15	4.9	15		Group 2: 9
6OHDA+Desi	17	2	59.9083	73.7836	70.5495	70.0964	66.9156				6OHDA+Desi	17	2	3.8	5.8	7.7
6OHDA+Desi	20	2	45.1792	52.2612	42.8503	50.3042	55.2241		Between contrast coefficients		6OHDA+Desi	20	2	4.1	9.8	18.9		Between contrast coefficients
6OHDA+Desi	22	2	44.6001	51.8625	58.3192	65.2967	76.1737		Contrast Group...		6OHDA+Desi	22	2	7.75	6.8	4.1		Contrast Group...
6OHDA+Desi	27	2	48.9314	48.7347	46.5924	48.0334	51.1478		1 2		6OHDA+Desi	27	2	6.95	3.2	18.6		1 2
6OHDA+Desi	28	2	78.5031	77.3933	75.8957	77.1677	83.1938		ctl v desi B1 1 -1		6OHDA+Desi	28	2	9.4	8.9	19.5		ctl v desi B1 1 -1
6OHDA+Desi	30	2	72.0166	71.8676	69.885	71.4173	71.4609				6OHDA+Desi	30	2	6.05	5.2	7
									Within contrast coefficients									Within contrast coefficients
									Contrast Measurement...									Contrast Measurement...
									1 2 3 4 5									1 2
									linear W1 -2 -1 0 1 2									dev v ndeval W1 1 -1
									Means and Standard Deviations									Means and Standard Deviations
									Group 1 Overall Mean: 62.003									Group 1 Overall Mean: 8.806
									Measurement 1 2 3 4 5									Measurement 1 2
									Mean 56.713 60.988 57.050 68.425 66.838									Mean 6.988 10.625
									SD 8.347 7.326 5.772 7.167 10.811									SD 4.891 9.489
									Group 2 Overall Mean: 58.302									Group 2 Overall Mean: 8.767
									Measurement 1 2 3 4 5									Measurement 1 2
									Mean 52.722 58.233 57.078 60.578 62.900									Mean 6.156 11.378
									SD 15.415 14.254 14.744 12.078 13.080									SD 2.430 6.555
									Means and SDs averaged across groups									Means and SDs averaged across groups
									Measurement 1 2 3 4 5									Measurement 1 2
									Mean 54.717 59.610 57.064 64.501 64.869									Mean 6.572 11.001
									SD 12.619 11.550 11.467 10.089 12.074									SD 3.783 8.058
									--------------------------------------------------------------------									--------------------------------
									Analysis of Variance Summary Table									Analysis of Variance Summary Table
									Source SS df MS F									Source SS df MS F
									------------------------------------------------									------------------------------------------------
									Between									Between
									------------------------------------------------									------------------------------------------------
									ctl v desi B1 289.949 1 289.949 0.519									ctl v desi B1 0.013 1 0.013 0.000
									Error 8373.712 15 558.247									Error 713.864 15 47.591
									------------------------------------------------									------------------------------------------------
									Within									Within
									------------------------------------------------									------------------------------------------------
									linear W1 1075.299 1 1075.299 15.757									dev v ndeval W1 166.224 1 166.224 5.252
									B1W1 10.535 1 10.535 0.154									B1W1 5.318 1 5.318 0.168
									Error 1023.615 15 68.241									Error 474.757 15 31.650
									------------------------------------------------									------------------------------------------------
