# Supplementary material for: Inhibition of noradrenergic signalling in rodent orbitofrontal cortex impairs the updating of goal-directed actions
Source: eLife. 2023 Feb 20;12:e81623. doi: 10.7554/eLife.81623 (PMC9988255; doi:10.7554/eLife.81623)
Supplement: Figure 4—figure supplement 1—source data 1. — This excel file contains the data from the quantification of hM4Di/c-Fos-positive cells, as well as the percentages of colocalization, for rats injected with CAV2-PRS-hM4Di-mCherry in Area 32 (A32) that underwent the stress procedure. [file elife-81623-fig4-figsupp1-data1.xlsx]

## Sheet: RESULTS LC (-9.50->-10.0 mm)
	Rat	Tretment	Condition	CAV2 PRS (hM4Di+)	hM4Di+/c-Fos+	Colocalization (%)
	BBI25	Vehicle	No stress	13.4286	1.14286	8.51064
	BBI30	Vehicle	No stress	16.1818	2.45455	15.1685
				14.8052	1.7987	11.8396
				1.37662	0.655844	3.32895
	Rat	Tretment	Condition	CAV2 PRS (hM4Di+)	hM4Di+/c-Fos+	Colocalization (%)
	BBI15	Vehicle	Stress	18.4286	11.8571	64.3411
	BBI17	Vehicle	Stress	13.7143	7	51.0417
	BBI19	Vehicle	Stress	10.4	5.4	51.9231
	BBI21	Vehicle	Stress	12.3333	6.33333	51.3514
				13.719	7.64762	54.6643
				1.71065	1.44103	3.23076
	Rat	Tretment	Condition	CAV2 PRS (hM4Di+)	hM4Di+/c-Fos+	Colocalization (%)
	BBI16	DCZ	Stress	14	6.75	48.2143
	BBI18	DCZ	Stress	11.4286	4.14286	36.25
	BBI20	DCZ	Stress	10.8333	4.16667	38.4615
	BBI29	DCZ	Stress	20.3077	3.61538	17.803
				14.1424	4.66873	35.1822
				2.16691	0.705327	6.34931
			T-test:	0.883153	0.112735	0.0339733
