# Supplementary material for: Inhibition of noradrenergic signalling in rodent orbitofrontal cortex impairs the updating of goal-directed actions
Source: eLife. 2023 Feb 20;12:e81623. doi: 10.7554/eLife.81623 (PMC9988255; doi:10.7554/eLife.81623)
Supplement: Figure 5—figure supplement 1—source data 1. — This excel file contains the behavioural data from the initial training and outcome devaluation test, as well as the consumption tests (initial and reversal) for rats injected with CAV2-PRS-hM4Di-mCherry in the orbitofrontal cortex (OFC). [file elife-81623-fig5-figsupp1-data1.xlsx]

## Sheet: Panel A
Initial training			Training session													===================================
Group	Rat #	Group label	1	2	3	4	5	6	7	8	9	10	11	12		PSY
SAL	2	1	1.19514	1.39642	4.47582	6.08882	6.52837	9.25754	7.625	15	20.5285	19.4	23.8	27.125		===================================
SAL	8	1	2.91995	2.93253	3.60287	12.3282	10.1517	14.3178	26.5655	20.83	25.7944	21.65	26.1	19.8		Title: LC:OFC initial training
SAL	10	1	0	3.74188	4.45929	11.4767	10.841	12.4655	20.9962	25.9423	18.4245	25.575	24.025	40.1052		Date: 3/10/2022 Time: 5:18:47 PM
SAL	11	1	0.1	3.12936	3.34404	8.90171	12.9631	20.9279	23.6309	23.3687	28.4416	25.9691	22.9	43.3802		-----------------------------------
SAL	14	1	0.45	3.49043	3.63264	12.2334	11.4063	14.1423	6.625	11.9	23.9822	29.0018	32.1728	41.9869
SAL	16	1	1.7005	3.90023	6.34584	9.70427	12.902	21.4523	21.8869	22.6579	26.4877	30.675	33.5601	38.3039		Number of Groups: 2
SAL	17	1	0.860382	1.72699	2.42051	12.4633	4.39923	6.65502	11.7	13.85	21.2037	30.7099	30.8595	43.5033		Number of Measurements: 12
SAL	22	1	1.225	2.6203	3.37761	5.34942	4.65	6.40073	5.27321	11.2933	12.95	11	11.325	10.35
SAL	24	1	0.275	0.5	1.41681	3.07497	3.525	6.59843	13.2892	11.5758	17.1154	28.45	34.2319	33.725		Number of subjects in...
SAL	47	1	5.15585	11.4171	11.0931	13.2891	14.5511	18.1941	18.8141	22.3143	19.7657	15.6	20.6	25.6445		Group 1: 12
SAL	48	1	2.46025	5.24018	4.81323	9.68662	12.951	19.2673	18.7972	19.5936	27.378	25.4963	26.0271	36.553		Group 2: 13
SAL	49	1	1.80629	9.51717	11.3921	10.1102	14.2684	14.5856	15.05	17.9129	16.4393	12.875	31.15	31.6878
DCZ	4	2	0.7	1.43532	1.8369	5.45779	4.38419	11.9704	13.4106	18.4923	21.517	19.675	21.025	17.5		Between contrast coefficients
DCZ	7	2	0.1	0.1	2.52353	6.44309	8.14258	10.1365	17.6704	17.3054	17.1042	21.675	30.425	26.625		Contrast Group...
DCZ	9	2	0	0.125	0.325	0.175	0.15	0.225	0	8.4	14.425	14.6	10.025	19.025		1 2
DCZ	12	2	0.975	1.94528	2.18564	10.9211	15.2808	12.0468	24.1866	30.8904	38.9374	25.275	18.2	39.2983		sal v DCZ B1 1 -1
DCZ	13	2	4.39912	6.26846	9.86751	17.9675	23.4795	26.012	23.645	29.4509	36.7375	32.225	33.4774	41.2908
DCZ	15	2	0.25	1.97036	1.39468	5.58904	6.0495	6.80113	5.55	13.1676	16.2974	20.725	22.775	22.45		Within contrast coefficients
DCZ	18	2	0.025	0.3	0.425	0.824994	1.925	5.55	7.475	9.725	10.45	12.575	14.75	15.975		Contrast Measurement...
DCZ	20	2	0.025	1.6557	0.920499	5.0991	6.32111	5.82142	8.8	10.4	14.6429	14.375	11.3	16.1		1 2 3 4 5 6 7 8 9 10 11 12
DCZ	21	2	0.175	0.125	0.3	2.17499	5.225	3.825	6.8	5.95	11.575	11.4736	13.95	15.475		linear W1 -11 -9 -7 -5 -3 -1 1 3 5 7 9 11
DCZ	23	2	0.025	0.425	3.10936	6.51258	11.3826	17.3444	15.3807	29.7024	30.4511	27.2	34.9801	38.287
DCZ	45	2	2.43903	5.60776	3.6813	12.9914	17.1844	15.6033	19.3337	26.1921	31.0362	24.0172	31.766	43.4671		Means and Standard Deviations
DCZ	46	2	2.1255	7.83272	7.17435	16.2071	18.8513	23.2349	22.0073	21.6377	24.5275	25.944	17.05	20.375		Group 1 Overall Mean: 15.115
DCZ	50	2	1.59734	6.6728	9.08539	10.975	21.0605	17.4044	22.3568	23.667	30.6082	27.375	28.4046	37.7383		Measurement 1 2 3 4 5 6 7 8 9 10 11 12
																Mean 1.512 4.134 5.031 9.559 9.928 13.689 15.854 18.020 21.543 23.034 26.396 32.680
																SD 1.472 3.235 3.149 3.211 4.062 5.555 7.038 5.156 4.896 6.887 6.565 10.300
																Group 2 Overall Mean: 13.690
																Measurement 1 2 3 4 5 6 7 8 9 10 11 12
																Mean 0.987 2.651 3.295 7.795 10.726 11.998 14.355 18.845 22.947 21.318 22.164 27.200
																SD 1.330 2.858 3.306 5.630 7.671 7.687 7.969 8.780 9.731 6.484 8.770 11.033
																Means and SDs averaged across groups
																Measurement 1 2 3 4 5 6 7 8 9 10 11 12
																Mean 1.250 3.393 4.163 8.677 10.327 12.843 15.105 18.432 22.245 22.176 24.280 29.940
																SD 1.400 3.044 3.232 4.634 6.212 6.752 7.538 7.276 7.802 6.680 7.794 10.688
																--------------------------------------------------------------------------------------------------------------------------------------------------------
																Analysis of Variance Summary Table
																Source SS df MS F
																------------------------------------------------
																Between
																------------------------------------------------
																sal v DCZ B1 152.041 1 152.041 0.526
																Error 6645.269 23 288.925
																------------------------------------------------
																Within
																------------------------------------------------
																linear W1 22878.589 1 22878.589 236.057
																B1W1 43.277 1 43.277 0.447
																Error 2229.156 23 96.920
																------------------------------------------------

## Sheet: Panel B
Initial test						===================================
Group	Rat #	Group label	Dev (lever)	Ndev (lever)		PSY
SAL	2	1	11	0.5		===================================
SAL	8	1	8.8	0.2		Title: LC:OFC initial test
SAL	10	1	11.9	9.8		Date: 4/10/2022 Time: 4:58:03 PM
SAL	11	1	9.8	2.1		-----------------------------------
SAL	14	1	2.4	0.2
SAL	16	1	5.7	0.3		Number of Groups: 2
SAL	17	1	2.9	0.7		Number of Measurements: 2
SAL	22	1	0.9	0
SAL	24	1	14.3	0		Number of subjects in...
SAL	47	1	6.1	0		Group 1: 12
SAL	48	1	17	0.7		Group 2: 13
SAL	49	1	6.5	0
DCZ	4	2	0.2	0		Between contrast coefficients
DCZ	7	2	10.9	2		Contrast Group...
DCZ	9	2	2.4	0.9		1 2
DCZ	12	2	10.6	2.1		B1 1 -1
DCZ	13	2	12.5	1.1
DCZ	15	2	5.8	0		Within contrast coefficients
DCZ	18	2	5.6	7.2		Contrast Measurement...
DCZ	20	2	9.5	1.8		1 2
DCZ	21	2	5.8	0		W1 1 -1
DCZ	23	2	4.8	3.9
DCZ	45	2	2.1	5.1		Means and Standard Deviations
DCZ	46	2	18.7	0.2		Group 1 Overall Mean: 4.658
DCZ	50	2	15	5.6		Measurement 1 2
						Mean 8.108 1.208
						SD 4.932 2.769
						Group 2 Overall Mean: 5.146
						Measurement 1 2
						Mean 7.992 2.300
						SD 5.430 2.404
						Means and SDs averaged across groups
						Measurement 1 2
						Mean 8.050 1.754
						SD 5.198 2.585
						--------------------------------
						Analysis of Variance Summary Table
						Source SS df MS F
						------------------------------------------------
						Between
						------------------------------------------------
						B1 2.970 1 2.970 0.160
						Error 426.153 23 18.528
						------------------------------------------------
						Within
						------------------------------------------------
						W1 494.727 1 494.727 32.608
						B1W1 4.551 1 4.551 0.300
						Error 348.955 23 15.172
						------------------------------------------------

## Sheet: Panel C-D
Consumption tests					Reversal test
			Initial test		Saline		DCZ			========================================				=========================================
Group	Rat #	Group label	Dev (Consump)	Ndev (Consump)	Dev (Consump)	Ndev (Consump)	Dev (Consump)	Ndev (Consump)		PSY				PSY
SAL	2	1	0.6	0	1.1	0.6	2.5	0		========================================				=========================================
SAL	8	1	1.6	0	4.5	0	4.4	0		Title: LC:OFC initial consumption test				Title: LC:OFC reversal consumption test
SAL	10	1	1.8	0	1.3	0.8	0.2	0		Date: 4/10/2022 Time: 5:00:03 PM				Date: 4/10/2022 Time: 5:05:38 PM
SAL	11	1	1.4	0	2.6	0.6	1.2	1.2		----------------------------------------				-----------------------------------------
SAL	14	1	0.5	0	0	0	1.7	0.6
SAL	16	1	1.5	0	2.5	0.1	6.8	0		Number of Groups: 2				Number of Groups: 2
SAL	17	1	0.3	0	5.9	0	2.1	0		Number of Measurements: 2				Number of Measurements: 4
SAL	22	1	0.8	0	0.9	0	2.4	0
SAL	24	1	0.1	0	1.3	1.1	1.5	0		Number of subjects in...				Number of subjects in...
SAL	47	1	1	0	1.4	0.2	3.2	1.2		Group 1: 12				Group 1: 12
SAL	48	1	2	0	1.1	0	2.7	0.2		Group 2: 13				Group 2: 13
SAL	49	1	1.2	0	2.1	0.6	3.4	0
DCZ	4	2	1.2	0	1.9	0.3	0.2	0		Between contrast coefficients				Between contrast coefficients
DCZ	7	2	0	0	1.9	1.8	5.9	0		Contrast Group...				Contrast Group...
DCZ	9	2	0.5	0	3.2	0	3.9	0.6		1 2				1 2
DCZ	12	2	1.1	0	1.3	1.6	6.4	0		B1 1 -1				B1 1 -1
DCZ	13	2	3.6	0	3.4	0	1.5	0
DCZ	15	2	1.1	0	1.1	0	0.9	0		Within contrast coefficients				Within contrast coefficients
DCZ	18	2	2.7	0	7.3	0	2.8	0.2		Contrast Measurement...				Contrast Measurement...
DCZ	20	2	0.9	0	4.9	1.2	1.3	1.4		1 2				1 2 3 4
DCZ	21	2	0.4	0	7.1	0	0.7	1.2		W1 1 -1				sal v DCZ W1 1 1 -1 -1
DCZ	23	2	2.2	0	4.7	0	3.4	0						dev v ndev W2 1 -1 1 -1
DCZ	45	2	0.7	0	1.6	1	2.2	0.1		Means and Standard Deviations				int W3 1 -1 -1 1
DCZ	46	2	1.7	0.4	2.8	0	3.2	2.6		Group 1 Overall Mean: 0.533
DCZ	50	2	3.9	0	3.5	0	2.7	0		Measurement 1 2				Means and Standard Deviations
										Mean 1.067 0.000				Group 1 Overall Mean: 1.333
										SD 0.614 0.000				Measurement 1 2 3 4
														Mean 2.058 0.333 2.675 0.267
										Group 2 Overall Mean: 0.785				SD 1.657 0.387 1.702 0.470
										Measurement 1 2
										Mean 1.538 0.031				Group 2 Overall Mean: 1.765
										SD 1.224 0.111				Measurement 1 2 3 4
														Mean 3.438 0.454 2.700 0.469
										Means and SDs averaged across groups				SD 2.055 0.686 1.899 0.801
										Measurement 1 2
										Mean 1.303 0.015				Means and SDs averaged across groups
										SD 0.981 0.080				Measurement 1 2 3 4
										--------------------------------				Mean 2.748 0.394 2.688 0.368
														SD 1.875 0.563 1.807 0.664
										Analysis of Variance Summary Table				--------------------------------------------------------
										Source SS df MS F				Analysis of Variance Summary Table
										------------------------------------------------
										Between				Source SS df MS F
										------------------------------------------------				------------------------------------------------
										B1 0.788 1 0.788 1.617				Between
										Error 11.207 23 0.487				------------------------------------------------
										------------------------------------------------				B1 4.659 1 4.659 2.763
										Within				Error 38.784 23 1.686
										------------------------------------------------				------------------------------------------------
										W1 20.677 1 20.677 42.930				Within
										B1W1 0.607 1 0.607 1.260				------------------------------------------------
										Error 11.078 23 0.482				sal v DCZ W1 0.047 1 0.047 0.030
										------------------------------------------------				B1W1 2.528 1 2.528 1.645
														Error 35.353 23 1.537
														dev v ndev W2 136.342 1 136.342 74.194
														B1W2 1.827 1 1.827 0.994
														Error 42.266 23 1.838
														int W3 0.008 1 0.008 0.003
														B1W3 3.222 1 3.222 1.299
														Error 57.032 23 2.480
														------------------------------------------------
