# Supplementary material for: Inhibition of noradrenergic signalling in rodent orbitofrontal cortex impairs the updating of goal-directed actions
Source: eLife. 2023 Feb 20;12:e81623. doi: 10.7554/eLife.81623 (PMC9988255; doi:10.7554/eLife.81623)
Supplement: Figure 5—figure supplement 2—source data 1. — This excel file contains the behavioural data from the initial training and outcome devaluation test, as well as the consumption tests (initial and reversal) for rats injected with CAV2-PRS-hM4Di-mCherry in A32. [file elife-81623-fig5-figsupp2-data1.xlsx]

## Sheet: Panel A
Initial training			Training session													===================================
Group	Rat #	Group label	1	2	3	4	5	6	7	8	9	10	11	12		PSY
SAL	27	1	0.05	4.38544	6.88061	16.6368	18.9225	22.2023	21.898	17.6539	26.1929	24.425	25.15	34.2915		===================================
SAL	30	1	3.99328	5.27594	8.46683	12.0023	19.6369	22.4355	31.1431	41.0612	40.5661	33.2546	29.5301	47.0552		Title: LC:A32 initial training
SAL	35	1	3.43347	2.5388	5.70356	6.20929	11.4532	7.65	16.2887	17.1727	18.2203	23.1	27.5764	20.7		Date: 4/10/2022 Time: 5:17:17 PM
SAL	37	1	2.66456	2.76946	3.20614	7.01885	13.2067	18.3508	14.7	18.3692	23.9213	24.325	19.3	25.85		-----------------------------------
SAL	32	1	0.15	10.3054	8.49648	12.2471	15.1944	18.8087	18.0693	22.3485	26.7715	18.1214	16.675	15.925
SAL	33	1	0.835379	0.45	0.959896	13.373	14.2795	7.73745	17.7499	12.625	17.7371	22.075	22.875	21.075		Number of Groups: 2
SAL	36	1	0.74589	10.9085	9.4711	18.3871	22.9033	22.4628	30.2625	31.4382	35.8735	28.45	18.95	27.5		Number of Measurements: 12
SAL	43	1	0	2.44494	2.56609	5.275	8.27103	8.90707	11.7	15.9729	17.2054	18.4	15.975	22.3
DCZ	31	2	1.43043	2.3708	2.86029	10.5479	5.41134	10.817	15.625	15.2011	18.8527	21.025	24.5	20.025		Number of subjects in...
DCZ	38	2	1.28273	9.08333	12.5236	17.2066	20.9858	23.9109	26.5852	32.8392	31.1431	24.9926	27.5654	31.5283		Group 1: 8
DCZ	40	2	3.80117	4.68023	5.12767	11.6197	17.7042	18.8996	15.1753	21.3998	23.7442	25.65	25	21.525		Group 2: 9
DCZ	41	2	3.65852	1.08555	7.46849	12.3493	22.6147	20.514	27.1289	25.0286	21.0859	26.65	23.275	26.9568
DCZ	28	2	0.425	6.54005	8.26191	14.8181	19.7983	22.5063	25.2254	28.1803	35.5702	28.822	33.8844	42.7748		Between contrast coefficients
DCZ	29	2	0.474974	10.0174	15.6192	20.2762	30.6026	31.6641	34.4128	27.7172	33.3624	19.45	26.075	33.1281		Contrast Group...
DCZ	34	2	1.68982	5.46039	9.0496	11.9544	20.5259	19.8986	21.8067	19.5337	22.9768	22.5	24.05	26.025		1 2
DCZ	39	2	0.15	7.02042	7.90126	15.2628	19.4996	26.0168	25.1478	29.8304	25.391	26.4799	35.7564	31.0803		B1 1 -1
DCZ	44	2	1.4532	3.60869	4.86905	13.1207	16.8615	15.8806	18.4149	13.1794	27.469	27.3	22.85	29.25
																Within contrast coefficients
																Contrast Measurement...
																1 2 3 4 5 6 7 8 9 10 11 12
																linear W1 -11 -9 -7 -5 -3 -1 1 3 5 7 9 11
																Means and Standard Deviations
																Group 1 Overall Mean: 16.335
																Measurement 1 2 3 4 5 6 7 8 9 10 11 12
																Mean 1.484 4.886 5.720 11.395 15.483 16.070 20.226 22.080 25.811 24.020 22.006 26.839
																SD 1.623 3.813 3.153 4.853 4.767 6.795 7.092 9.502 8.622 5.015 5.066 9.829
																Group 2 Overall Mean: 18.698
																Measurement 1 2 3 4 5 6 7 8 9 10 11 12
																Mean 1.596 5.541 8.187 14.129 19.333 21.123 23.282 23.657 26.621 24.763 26.997 29.146
																SD 1.323 2.960 3.939 3.105 6.564 5.970 6.194 6.752 5.708 3.113 4.680 6.769
																Means and SDs averaged across groups
																Measurement 1 2 3 4 5 6 7 8 9 10 11 12
																Mean 1.540 5.214 6.953 12.762 17.408 18.597 21.754 22.868 26.216 24.392 24.501 27.992
																SD 1.470 3.385 3.593 4.016 5.796 6.369 6.629 8.152 7.216 4.112 4.864 8.338
																--------------------------------------------------------------------------------------------------------------------------------------------------------
																Analysis of Variance Summary Table
																Source SS df MS F
																------------------------------------------------
																Between
																------------------------------------------------
																B1 283.756 1 283.756 1.366
																Error 3116.155 15 207.744
																------------------------------------------------
																Within
																------------------------------------------------
																linear W1 13432.377 1 13432.377 278.732
																B1W1 7.899 1 7.899 0.164
																Error 722.865 15 48.191
																------------------------------------------------

## Sheet: Panel B
Initial test						===================================
Group	Rat #	Group label	Dev (lever)	Ndev (lever)		PSY
SAL	27	1	9.7	6.3		===================================
SAL	30	1	10.9	4.9		Title: LC:A32 initial test
SAL	35	1	19.8	0.2		Date: 4/10/2022 Time: 5:19:37 PM
SAL	37	1	18.8	0		-----------------------------------
SAL	32	1	9.5	4.5
SAL	33	1	0	1.1		Number of Groups: 2
SAL	36	1	2	4.3		Number of Measurements: 2
SAL	43	1	15	8.5
DCZ	31	2	19.4	1		Number of subjects in...
DCZ	38	2	15.2	3.4		Group 1: 8
DCZ	40	2	12.6	8.5		Group 2: 9
DCZ	41	2	22.2	0.3
DCZ	28	2	3.3	15.1		Between contrast coefficients
DCZ	29	2	13.1	0		Contrast Group...
DCZ	34	2	10.7	4.1		1 2
DCZ	39	2	3	0		B1 1 -1
DCZ	44	2	11.7	0
						Within contrast coefficients
						Contrast Measurement...
						1 2
						W1 1 -1
						Means and Standard Deviations
						Group 1 Overall Mean: 7.219
						Measurement 1 2
						Mean 10.713 3.725
						SD 7.167 3.046
						Group 2 Overall Mean: 7.978
						Measurement 1 2
						Mean 12.356 3.600
						SD 6.403 5.161
						Means and SDs averaged across groups
						Measurement 1 2
						Mean 11.534 3.663
						SD 6.770 4.305
						--------------------------------
						Analysis of Variance Summary Table
						Source SS df MS F
						------------------------------------------------
						Between
						------------------------------------------------
						B1 4.880 1 4.880 0.216
						Error 339.080 15 22.605
						------------------------------------------------
						Within
						------------------------------------------------
						W1 524.846 1 524.846 12.567
						B1W1 6.620 1 6.620 0.159
						Error 626.445 15 41.763
						------------------------------------------------

## Sheet: Panel C-D
Consumption tests					Reversal test					========================================				=========================================
			Initial test		Saline		DCZ			PSY				PSY
Group	Rat #	Group label	Dev (Consump)	Ndev (Consump)	Dev (Consump)	Ndev (Consump)	Dev (Consump)	Ndev (Consump)		========================================				=========================================
SAL	27	1	0.1	0	0.4	0	0.6	0		Title: LC:A32 initial consumption test				Title: LC:A32 reversal consumption test
SAL	30	1	1.1	1	1.7	1.5	4.6	0		Date: 4/10/2022 Time: 5:21:49 PM				Date: 4/10/2022 Time: 5:23:53 PM
SAL	35	1	1.2	0	2.2	0	0.4	0		----------------------------------------				-----------------------------------------
SAL	37	1	3.3	0	1.4	0	2.2	0.1
SAL	32	1	1.2	0	1.9	1.6	0.9	0		Number of Groups: 2				Number of Groups: 2
SAL	33	1	1.8	0	3	0	2.8	1.6		Number of Measurements: 2				Number of Measurements: 4
SAL	36	1	0.7	0.2	1.5	0.2	3.9	0
SAL	43	1	2.5	0	1.9	0	1.8	0.1		Number of subjects in...				Number of subjects in...
DCZ	31	2	0.8	0	2.6	0.8	1.1	1.3		Group 1: 8				Group 1: 8
DCZ	38	2	0.1	0	1.4	0	0.1	2		Group 2: 9				Group 2: 9
DCZ	40	2	2.4	0	0.9	0.3	2.6	0
DCZ	41	2	0.3	0	2.6	0	1.5	1.1		Between contrast coefficients				Between contrast coefficients
DCZ	28	2	1.8	0	1.5	1.3	1.6	0		Contrast Group...				Contrast Group...
DCZ	29	2	0.9	0.1	0.6	0	3.8	0		1 2				1 2
DCZ	34	2	0.9	1.3	1.3	0	3.4	0		B1 1 -1				B1 1 -1
DCZ	39	2	1.5	0	1.5	0.9	1.9	0.9
DCZ	44	2	3.3	0.1	3	0	2.6	0		Within contrast coefficients				Within contrast coefficients
										Contrast Measurement...				Contrast Measurement...
			1	0.4	0	0.6	0			1 2				1 2 3 4
			1	1.7	1.5	4.6	0			W1 1 -1				sal v DCZ W1 1 1 -1 -1
			1	2.2	0	0.4	0							dev v ndev W2 1 -1 1 -1
			1	1.4	0	2.2	0.1			Means and Standard Deviations
			1	1.9	1.6	0.9	0			Group 1 Overall Mean: 0.819				Means and Standard Deviations
			1	3	0	2.8	1.6			Measurement 1 2				Group 1 Overall Mean: 1.134
			1	1.5	0.2	3.9	0			Mean 1.488 0.150				Measurement 1 2 3 4
			1	1.9	0	1.8	0.1			SD 1.019 0.351				Mean 1.750 0.413 2.150 0.225
			2	2.6	0.8	1.1	1.3							SD 0.739 0.706 1.542 0.557
			2	1.4	0	0.1	2			Group 2 Overall Mean: 0.750
			2	0.9	0.3	2.6	0			Measurement 1 2				Group 2 Overall Mean: 1.183
			2	2.6	0	1.5	1.1			Mean 1.333 0.167				Measurement 1 2 3 4
			2	1.5	1.3	1.6	0			SD 1.031 0.427				Mean 1.711 0.367 2.067 0.589
			2	0.6	0	3.8	0							SD 0.828 0.502 1.158 0.757
			2	1.3	0	3.4	0			Means and SDs averaged across groups
			2	1.5	0.9	1.9	0.9			Measurement 1 2				Means and SDs averaged across groups
			2	3	0	2.6	0			Mean 1.410 0.158				Measurement 1 2 3 4
										SD 1.025 0.393				Mean 1.731 0.390 2.108 0.407
										--------------------------------				SD 0.788 0.606 1.351 0.672
														--------------------------------------------------------
										Analysis of Variance Summary Table
														Analysis of Variance Summary Table
										Source SS df MS F
										------------------------------------------------				Source SS df MS F
										Between				------------------------------------------------
										------------------------------------------------				Between
										B1 0.040 1 0.040 0.074				------------------------------------------------
										Error 8.089 15 0.539				B1 0.041 1 0.041 0.057
										------------------------------------------------				Error 10.610 15 0.707
										Within				------------------------------------------------
										------------------------------------------------				Within
										W1 13.279 1 13.279 19.920				------------------------------------------------
										B1W1 0.062 1 0.062 0.093				sal v DCZ W1 0.661 1 0.661 1.099
										Error 9.999 15 0.667				B1W1 0.141 1 0.141 0.235
										------------------------------------------------				Error 9.026 15 0.602
														dev v ndev W2 39.202 1 39.202 51.184
														B1W2 0.205 1 0.205 0.268
														Error 11.489 15 0.766
														------------------------------------------------
