# Supplementary material for: Inhibition of noradrenergic signalling in rodent orbitofrontal cortex impairs the updating of goal-directed actions
Source: eLife. 2023 Feb 20;12:e81623. doi: 10.7554/eLife.81623 (PMC9988255; doi:10.7554/eLife.81623)
Supplement: Figure 5—source data 1. — This excel file contains the behavioural data from the reversal training and outcome devaluation tests for rats injected with CAV2-PRS-hM4Di-mCherry in the OFC (vlOFC) or Area 32 (A32). [file elife-81623-fig5-data1.xlsx]

## Sheet: Fig 5B-C
Reversal training			Training session						====================================	Reversal test				Lever presses					====================================
Group	Rat #	Group label	1	2	3	4	5		PSY					Veh		DCZ			PSY
Veh	2	1	16.325	20.9227	27.475	33.9959	33.7246		====================================		Group	Rat #	Group label	Dev (lever)	Ndev (lever)	Dev (lever)	Ndev (lever)		====================================
Veh	8	1	7.95	25.4951	31.7552	38.9108	41.9222		Title: Reversal training OFC veh v DCZ		Veh	2	1	8.3	0.4	3.3	0.2		Title: Reversal test OFC veh v DCZ
Veh	10	1	32.7737	40.9855	45.7529	56.3793	44.1721		Date: 18/07/2022 Time: 14:47:43		Veh	8	1	20.5	4.4	8.3	2.3		Date: 18/07/2022 Time: 14:54:31
Veh	11	1	37.45	40.6983	51.9163	54.9078	58.9211		------------------------------------		Veh	10	1	8.5	0	6	1.2		------------------------------------
Veh	14	1	22.575	33.7112	43.3188	46.0951	52.9017				Veh	11	1	32.1	5.9	1.4	0
Veh	16	1	28.575	42.2211	42.9339	32.4435	43.926		Number of Groups: 2		Veh	14	1	0	0	0.9	1.6		Number of Groups: 2
Veh	17	1	14.6	27.9227	25.425	44.2974	41.5064		Number of Measurements: 5		Veh	16	1	6	7.8	0.1	13.6		Number of Measurements: 4
Veh	22	1	1.25	2.4	8.925	4.05	3.325				Veh	17	1	4.5	5.3	13.2	34.9
Veh	24	1	21.65	24	23.625	27.3079	26.9851		Number of subjects in...		Veh	22	1	0.5	0.2	14.6	0.1		Number of subjects in...
Veh	47	1	18.1988	27.025	20.15	14.65	31.3166		Group 1: 12		Veh	24	1	1.3	0.1	0	1		Group 1: 12
Veh	48	1	30.9469	31.491	42.8236	27.6412	37.9955		Group 2: 13		Veh	47	1	3.5	0.2	0.2	2.1		Group 2: 13
Veh	49	1	15.05	30.1688	32.555	30.525	32.825				Veh	48	1	8	0	5.8	2.8
DCZ	4	2	17.5	14.25	18.275	19.175	22.5866		Between contrast coefficients		Veh	49	1	7.5	0	0.1	4.6		Between contrast coefficients
DCZ	7	2	24.575	24.425	34.6221	35.6	32.025		Contrast Group...		DCZ	4	2	0	14	0	0.4		Contrast Group...
DCZ	9	2	14.575	12.475	20.1	18.45	20.775		1 2		DCZ	7	2	16	18.3	2.2	6.5		1 2
DCZ	12	2	37.0745	45.5976	48.3193	50.1308	52.4333		veh v DCZ B1 1 -1		DCZ	9	2	10.6	0.4	0.7	5.7		veh v DCZ B1 1 -1
DCZ	13	2	34.7749	35.9578	43.2097	46.798	44.5634				DCZ	12	2	14.7	0.3	0	0		B2 1 0
DCZ	15	2	17.15	22.45	30.425	33.35	35.385		Within contrast coefficients		DCZ	13	2	15.5	23.9	5.5	0.5		B3 0 1
DCZ	18	2	12.85	15.75	16.5	20.8	19.925		Contrast Measurement...		DCZ	15	2	0.1	0	0	0
DCZ	20	2	9.875	13.4	15.15	21.5943	27.925		1 2 3 4 5		DCZ	18	2	3.6	6.1	33.8	11.9		*** Caution ***
DCZ	21	2	10.65	12.1	18.875	27.09	27.9574		linear W1 -2 -1 0 1 2		DCZ	20	2	2.2	3.6	21.7	1.8		B2 coefficients do not sum to zero
DCZ	23	2	33.35	38.2938	41.3086	51.6818	52.6721				DCZ	21	2	3.5	5.2	4.9	19.4		B3 coefficients do not sum to zero
DCZ	45	2	38.9739	22.4	26.2674	30.2237	21.6		Means and Standard Deviations		DCZ	23	2	4.4	8.4	13.5	12.3
DCZ	46	2	33.2443	27.6127	40.6855	36.7539	24.05		Group 1 Overall Mean: 30.860		DCZ	45	2	0.4	8.3	5	6.9		Within contrast coefficients
DCZ	50	2	18.425	32.0082	31.6266	27.8	20.4		Measurement 1 2 3 4 5		DCZ	46	2	0.3	15.2	0.7	10.6		Contrast Measurement...
									Mean 20.608 28.917 33.058 34.267 37.450		DCZ	50	2	0	9.1	0	7.8		1 2 3 4
									SD 10.601 10.873 12.591 15.319 14.050										veh v DCZ W1 1 1 -1 -1
																			deval v ndev W2 1 -1 1 -1
									Group 2 Overall Mean: 28.109										interact W3 1 -1 -1 1
									Measurement 1 2 3 4 5										W4 1 -1 0 0
									Mean 23.308 24.377 29.646 32.262 30.954										W5 0 0 1 -1
									SD 10.765 10.965 11.353 11.543 11.899
																			Means and Standard Deviations
									Means and SDs averaged across groups										Group 1 Overall Mean: 5.069
									Measurement 1 2 3 4 5										Measurement 1 2 3 4
									Mean 21.958 26.647 31.352 33.264 34.202										Mean 8.392 2.025 4.492 5.367
									SD 10.687 10.921 11.961 13.481 12.972										SD 9.232 2.925 5.201 10.005
									--------------------------------------------------------------------
																			Group 2 Overall Mean: 6.844
									Analysis of Variance Summary Table										Measurement 1 2 3 4
																			Mean 5.485 8.677 6.769 6.446
									Source SS df MS F										SD 6.346 7.383 10.348 5.974
									------------------------------------------------
									Between										Means and SDs averaged across groups
									------------------------------------------------										Measurement 1 2 3 4
									veh v DCZ B1 236.082 1 236.082 0.389										Mean 6.938 5.351 5.630 5.906
									Error 13974.582 23 607.591										SD 7.860 5.704 8.295 8.154
									------------------------------------------------										--------------------------------------------------------
									Within
									------------------------------------------------										Analysis of Variance Summary Table
									linear W1 2414.952 1 2414.952 37.527
									B1W1 156.890 1 156.890 2.438										Source SS df MS F
									Error 1480.119 23 64.353										------------------------------------------------
									------------------------------------------------										Between
																			------------------------------------------------
																			veh v DCZ B1 78.682 1 78.682 1.221
																			B2 1233.227 1 1233.227 19.133
																			B3 2435.862 1 2435.862 37.791
																			Error 1482.481 23 64.456
																			------------------------------------------------
																			Within
																			------------------------------------------------
																			veh v DCZ W1 3.531 1 3.531 0.043
																			B1W1 0.235 1 0.235 0.003
																			B2W1 0.935 1 0.935 0.011
																			B3W1 2.909 1 2.909 0.036
																			Error 1872.535 23 81.415
																			deval v ndev W2 10.728 1 10.728 0.212
																			B1W2 109.051 1 109.051 2.156
																			B2W2 90.475 1 90.475 1.789
																			B3W2 26.756 1 26.756 0.529
																			Error 1163.369 23 50.581
																			interact W3 21.661 1 21.661 0.653
																			B1W3 180.514 1 180.514 5.445
																			B2W3 157.325 1 157.325 4.745
																			B3W3 40.163 1 40.163 1.211
																			Error 762.522 23 33.153
																			W4 31.439 1 31.439 0.918
																			B1W4 285.087 1 285.087 8.323
																			B2W4 243.207 1 243.207 7.101
																			B3W4 66.240 1 66.240 1.934
																			Error 787.778 23 34.251
																			W5 0.950 1 0.950 0.019
																			B1W5 4.478 1 4.478 0.091
																			B2W5 4.594 1 4.594 0.093
																			B3W5 0.678 1 0.678 0.014
																			Error 1138.113 23 49.483
																			------------------------------------------------

## Sheet: Fig 5D-E
Reversal training			Training session						=========================================		Reversal test				Lever presses
Group	Rat #	Group label	1	2	3	4	5		PSY						Veh		DCZ			=====================================
Veh	27	1	22.45	29.075	31.187	21.488	26.4752		=========================================			Group	Rat #	Group label	Dev (lever)	Ndev (lever)	Dev (lever)	Ndev (lever)		PSY
Veh	30	1	30.9	36.25	34.3695	30.65	31.45		Title: Reversal training mPFC veh v DCZ			Veh	27	1	12.7	0.3	7	0		=====================================
Veh	35	1	33.8079	31.3555	40.7693	34.3418	37.3184		Date: 18/07/2022 Time: 15:01:16			Veh	30	1	12.7	11.2	9.2	5.9		Title: Reversal test mPFC veh v DCZ
Veh	37	1	28.2	39.6793	40.9475	30.77	32.8559		-----------------------------------------			Veh	35	1	10.4	8.8	1.1	16		Date: 18/07/2022 Time: 15:05:54
Veh	32	1	27.575	34.4409	35.3765	25.3486	30.2325					Veh	37	1	5	7.7	3.7	5.2		-------------------------------------
Veh	33	1	31.3	25.275	22.875	8.525	19.6		Number of Groups: 2			Veh	32	1	9.3	12.5	10.5	6.3
Veh	36	1	25.025	25.5	19.45	16.65	35.3562		Number of Measurements: 5			Veh	33	1	5.7	0.2	13.1	0.5		Number of Groups: 2
Veh	43	1	27.1545	40.9625	42.0174	26.7234	28.9434					Veh	36	1	0	0	0.1	3.4		Number of Measurements: 4
DCZ	31	2	27.9411	34.475	33.475	40.6643	32.1185		Number of subjects in...			Veh	43	1	19.5	7.5	30.7	1.7
DCZ	38	2	27.0226	34.8785	37.5867	15.2	34.7142		Group 1: 8			DCZ	31	2	11.7	22.9	14.6	7.1		Number of subjects in...
DCZ	40	2	29.1963	39.5976	31.5492	38.7555	45.6457		Group 2: 9			DCZ	38	2	6.1	4.4	1.3	9.1		Group 1: 8
DCZ	41	2	35.5772	48.2132	53.6453	46.2327	47.1191					DCZ	40	2	8.6	0.5	7.6	7.9		Group 2: 9
DCZ	28	2	22.675	29	24.85	17.1969	26.75		Between contrast coefficients			DCZ	41	2	2.3	0.2	6.1	0
DCZ	29	2	27.775	28.075	29.3774	24.975	27.0197		Contrast Group...			DCZ	28	2	2.8	0	19.6	3.5		Between contrast coefficients
DCZ	34	2	22.4	27.7454	29.1215	25.875	27.025		1 2			DCZ	29	2	6.6	4.4	18	7.9		Contrast Group...
DCZ	39	2	25.55	27.5	31.525	27.3	29.8166		veh v DCZ B1 1 -1			DCZ	34	2	0.8	0	10.4	2.3		1 2
DCZ	44	2	18.125	21.6187	20.375	12.775	20.4264					DCZ	39	2	16.2	3	12.5	2.9		veh v DCZ B1 1 -1
									Within contrast coefficients			DCZ	44	2	3.2	0	0.4	0.1
									Contrast Measurement...											Within contrast coefficients
									1 2 3 4 5											Contrast Measurement...
									linear W1 -2 -1 0 1 2											1 2 3 4
																				veh v DCZ W1 1 1 -1 -1
									Means and Standard Deviations											deval v ndev W2 1 -1 1 -1
									Group 1 Overall Mean: 29.825											interact W3 1 -1 -1 1
									Measurement 1 2 3 4 5
									Mean 28.313 32.838 33.375 24.313 30.288											Means and Standard Deviations
									SD 3.630 6.034 8.460 8.495 5.531											Group 1 Overall Mean: 7.434
																				Measurement 1 2 3 4
									Group 2 Overall Mean: 30.184											Mean 9.413 6.025 9.425 4.875
									Measurement 1 2 3 4 5											SD 5.931 5.132 9.727 5.101
									Mean 26.244 32.344 32.378 27.678 32.278
									SD 4.953 7.944 9.361 11.904 8.916											Group 2 Overall Mean: 6.250
																				Measurement 1 2 3 4
									Means and SDs averaged across groups											Mean 6.478 3.933 10.056 4.533
									Measurement 1 2 3 4 5											SD 5.005 7.358 6.824 3.519
									Mean 27.278 32.591 32.876 25.995 31.283
									SD 4.385 7.117 8.952 10.453 7.528											Means and SDs averaged across groups
									--------------------------------------------------------------------											Measurement 1 2 3 4
																				Mean 7.945 4.979 9.740 4.704
									Analysis of Variance Summary Table											SD 5.457 6.417 8.306 4.329
																				--------------------------------------------------------
									Source SS df MS F
									------------------------------------------------											Analysis of Variance Summary Table
									Between
									------------------------------------------------											Source SS df MS F
									veh v DCZ B1 2.736 1 2.736 0.012											------------------------------------------------
									Error 3471.430 15 231.429											Between
									------------------------------------------------											------------------------------------------------
									Within											veh v DCZ B1 23.764 1 23.764 0.345
									------------------------------------------------											Error 1031.915 15 68.794
									linear W1 3.380 1 3.380 0.157											------------------------------------------------
									B1W1 60.734 1 60.734 2.824											Within
									Error 322.622 15 21.508											------------------------------------------------
									------------------------------------------------											veh v DCZ W1 9.787 1 9.787 0.530
																				B1W1 29.914 1 29.914 1.619
																				Error 277.084 15 18.472
																				deval v ndev W2 271.200 1 271.200 5.763
																				B1W2 0.018 1 0.018 0.000
																				Error 705.885 15 47.059
																				interact W3 18.150 1 18.150 0.745
																				B1W3 3.489 1 3.489 0.143
																				Error 365.249 15 24.350
																				------------------------------------------------
